# Supplementary material for: Generation of Doubled Haploid Wheat-Triticum urartu Introgression Lines and Their Characterisation Using Chromosome-Specific KASP Markers
Source: Front Plant Sci. 2021 May 13;12:643636. doi: 10.3389/fpls.2021.643636 (PMC8155260; doi:10.3389/fpls.2021.643636)
Supplement: Supplementary file 2 [file Table_2.xlsx]

## Sheet: Table S2
Table S2. KASP assay primer squence for each KASP assay in addition to the SNP reference, its flanking sequnce and chromosome position in the wheat reference genome sequence (RefSeqv1.0)
KASP ID	SNP ID	Chr	Pos	Flanking_sequence	FAM primer	VIC primer	Common
WRC1001	TraesCS1A01G013300.1	chr1A	7522336	ATGGGCAAGATGCTCGACAAGTTGGTCAGCACGATTCAGTTCTTCTCCATGGATGCTATCGTCAAGAAGGCCAACTCTGGCCTCCCCGAGATTTCCATGGGCAACATCCTCTACGA[T/G]GAGGTCATCAGGTACTCAAAGAACCCTTATCCTTACTTATTCAAGGAATGCTTCCTTCTCTTTGCGGGCCACGACTAA	GTTCTTTGAGTACCTGATGACCTTA	GTTCTTTGAGTACCTGATGACCTTC	CAGCACGATTCAGTTCTTCT
WRC1002	TraesCS1A01G049000.1	chr1A	30636156	GGAGGCGAAAATGAAAATTCGGCCTTCCGCTCGACACACGATGAAAACTTCCTCGCCTGTCACCTGATAAAAATTCTGGTGTTCTCTTCAGTCCG[A/T]GGTGCCTACAAGTTAGCACTGAATTTCAACTTCTTTGATCAGGGAGTCGGGGGTCCTAGTT	ATTCTGGTGTTCTCTTCAGTCCAA	ATTCTGGTGTTCTCTTCAGTCCAT	ACTCCCTGATCAAAGAAGTTG
WRC1003	TraesCS1A01G087600.1	chr1A	74743581	GCGAGGGAGGGGGCAAGCATAGAGGATTCTGGCGGTGGTGCTGCTCAGAACGGTGACAAA[A/G]GAGGAGGCTACTTTGGTTCTGACCTGCAGCGGCCGGTGTGGCA	CTGCTCAGAACGGTGACAATA	CTGCTCAGAACGGTGACAATG	CTGCAGGTCAGAACCAAA
WRC1004	TraesCS2A01G535500.1	chr2A	750330666	AGTTGGAGCTCTGGAGCTAGGCACTGAACTCGACAGCTATGCCTCGAAAAGAGGCCTGTACAGCAATGTATACATTGGGACTGCTTTGGTGGATATGGACTTGGAAGTGTGGAA[T/A]TCTCACCAGAGCCATACAAGTGTTTGGGAAATTGCCGTGCA	ATATGGACTTGGAAGTGTGGAGT	ATATGGACTTGGAAGTGTGGAGA	CCAAACACTTGTATGGCTCT
WRC1005	TraesCS2A01G549700.1	chr2A	757365390	GCCGCACGGCAAGGCGAGTTTCACCTCCTTGTGGCGCTCACGGAGAACGGCACAGCCAG[T/C]GGGGAGCTATTCTTGGATGACGGCGAGTCCATGGAGATGGGCGGGGTGGGAGGCAAGTGGACCCTGGTG	GTCATCCAAGAATAGCTCCCAA	GTCATCCAAGAATAGCTCCCAG	GTTTCACCTCCTTGTGGC
WRC1006	TraesCS3A01G263100.1	chr3A	486220086	ATGTCGGACACGGAGAGGTCCGTGGCGAGCTGCGTGGCGTACGTCGGCATGGAATTGAGGCAGAGGAGC[G/A]TGGCCAGGAATGGGAGGGTGGTGTCGATTGTGGAGGACACGGTCAGCAGCTGCGGAACAGCTCGCGTGAAAGCGCTGCGGCTGACGCCACGGTGCGGGTTCGGCCCGGCGGCCTGAGTTGA	TGGAATTGAGGCAGAGGAGAG	TGGAATTGAGGCAGAGGAGAA	CTCCACAATCGACACCAC
WRC1007	TraesCS3A01G289100.1	chr3A	517128293	ATGGATCCAGCGACCCCCGCAACATCTTTGTGCAGGGATCCAGCGAGCACGCCATGGCGTCCACCACATGCA[A/G]AGGAAGATGAAGGAGGGCGGCGGAGAAGACACAGGCATGAAGGTCACATTGTAGGAGTCAGGCAGGTCGCCGCTTCGGCCTTGGGCATGT	GCCCTCCTTCATCTTCCGT	GCCCTCCTTCATCTTCCGC	AACATCTTTGTGCAGGGA
WRC1008	TraesCS3A01G479500.1	chr3A	711070770	CCGCGTTTCCCTTATTTCTACCGCGTCTGGAGAGTGGGAGACTCACTGAGAAACAGAGAGACAGAGAGAGGGGGTAACCGTGGAGTCGATCTCGCGGCGGGGACTCCTCCGA[G/C]GCTTGTACGTCTTGCCGACCACCGGCGGCCTGTTCGCCGGT	GTCGGCAAGACGTACAAGGC	GTCGGCAAGACGTACAAGGG	TGGGAGACTCACTGAGAAAC
WRC1009	TraesCS4A01G213600.1	chr4A	511753945	ATGGCGACTGGGCGCTGCGGGCACACAGAGCACGCCCCAGAGCTCCACAGCCTCTGGCTCGGCTTCTCGACCAGCGGCCGCCTCTGCGCGTGGGACAACTTGTGTGCCCTCATT[A/G]TTACCACTGAAGCCTGCTCAAAGGCGAAGGCCGCTCATCTCCATCACTGGGAGGAGCGCCAGCCGCCGAGACAGCCATCCACTTCGCCATTGCCGACGTCCTCGCCCCGGCAGATCGAGAGAGAT	TTGAGCAGGCTTCAGTGGTATT	TTGAGCAGGCTTCAGTGGTATC	CCAGAGCTCCACAGCCTC
WRC1010	TraesCS4A01G238800.1	chr4A	548053472	GGGGAGAACGAGTCGGCGCCCCCGCTCGACGCCGGCGCGGTGCACCAGTCCGCGACAGCGGCCATCCAGTACTCCTCCGGCACGTCGGGGCGGGTGAAGGCGGTGGCGCTGTCGCACC[A/G]GAGCCTCATAGCGATGGCGGCGGGGCTGCACGCCCAGCACGTGAGGTCGAGGAAGGGCGTCGAGAGGAATCTGATGAGCGCTCCCATGTTCCACTCCATGGGCTTCTCGTCCGTGCTGAAC	CGCCATCGCTATGAGGCTAT	CGCCATCGCTATGAGGCTAC	GCCATCCAGTACTCCTCC
WRC1011	TraesCS4A01G241600.1	chr4A	551493367	GAGTCCGACCAGGGCGAGCTGGAAGAGGAGGCCCAGGAGCTCGCCGCCCCTCATGGTGAGGGCGCGCCCGACTTGGATGGTGGCCGCCAAGGCCAAC[A/G]CCAATGAGGATGTCGTCCTGGAGTTTGTCGGGGACCTCATCCCATTTGACAAGGCGCGTGCCACTACGAGCGCGTCC	AGGACGACATCCTCATTGCT	AGGACGACATCCTCATTGCC	AAGAGGAGGCCCAGGAGC
WRC1012	TraesCS4A01G252300.1	chr4A	564639555	ATGCTGAGGCTACTGGTCATTTGGGCAGCGATCTTGGGCTCCTGCCATGGGCAGTCCGAAGTGTCCCGGAGGAACAGCCG[T/C]CTGAGGGTGATGTCACCGCCGGAGCTCGAGGGCACATACGGCTGTGCCAGTACCGACTTCGGTTTCCCGCAGCACGCTGGCTCCATGACCGG	GTCCCGGAGGAACAGCCTT	GTCCCGGAGGAACAGCCTC	AACCGAAGTCGGTACTGG
WRC1013	TraesCS4A01G280400.1	chr4A	588930397	ATGGATCAAGGCCAAACCTTCGACTTCTTGCATTGGATCACCGTCC[G/T]CCAGACCCAATTGACCGAATATTGTACTCTTTACTTTGGAGACGCTGCTATCATATGTAGCGACGTTGGTCGCAACTATCTGAAGAGTGCTTACCGGTTTGTC	CTTGCATTGGATCACCGTCTG	CTTGCATTGGATCACCGTCTT	CTCTTCAGATAGTTGCGACC
WRC1014	TraesCS4A01G321400.1	chr4A	609813223	TCAGCAATCCCTAATGGCGCCAAGCATGTCCTCAAAATGGGCATGGATTACAGCGACAATACATGATTGGGGTTTATGATCTCAAACGTGATGTCTT[T/C]GTGCCAGATACTGTCATAGACGACTATCGGCTGTGGCTGAGGATCGATTATGGAAATTTCTATGCTTCAAAATCGTTCTTT	TGATCTCAAACGTGATGTCTGT	TGATCTCAAACGTGATGTCTGC	ATTTCCATAATCGATCCTCA
WRC1015	TraesCS5A01G202000LC.1	chr5A	238896152	ATGTGGAACCATAGAAGGAATTCAATCACTACTAATTGGTATATTTATTTATGCATCAATGACGATAGATGCATTC[T/G]CCATAGTTCCAGCATTACGGCAAACCCGTGTCAAATATATAGCGGATTTGGGCGCTCTAGCCAAAACGAATCCTATTTCGGCTATGACCTTCTCCATTACAAT	CCGTAATGCTGGAACTATGAA	CCGTAATGCTGGAACTATGAC	ATGTGGAACCATAGAAGGAAT
WRC1016	TraesCS5A01G213400LC.1	chr5A	259091622	GCTGCTGACGATGGCGCACATCCCGGCCACACATCAAGTGCAAGTTCA[T/C]GACGGTGACACGCTCGCCTTCGTGTCCGCGCTGACCGGAGCCTCCGCCTTCTGCCTTCGGCTCTGGCGTGAGAGGTTCCACTAG	ACACATCAAGTGCAAGTTCCT	ACACATCAAGTGCAAGTTCCC	CTAGTGGAACCTCTCACGC
WRC1017	TraesCS5A01G134900.1	chr5A	304862625	AGTTATAACTCTCACTCTCATTTATTCTCAGCAAACAAGAGAAGCACAAACACACT[A/G]TAGCACAATTTATGTGTTTGCTGCTACTTTTTCCCATTTGACAGAGGAAGATGGAGATGTAAGTTCATCACTATGA	AAGAGAAGCACAAACACACGA	AAGAGAAGCACAAACACACGG	ATCTCCATCTTCCTCTGTCA
WRC1018	TraesCS6A01G193600.1	chr6A	270459994	GCCTGGTGTGAAAGGGCATCTAGCCAATCTTAAGAGGCAGAAGCGAAC[G/A]GCAAGCAGATCACAGCTTCGAACAGTTTTAAATGAGCACCCAGCTACTGTCCGTCTATCAGATGCGGATGA	CGAAGCTGTGATCTGCTTGAC	CGAAGCTGTGATCTGCTTGAT	TCTAGCCAATCTTAAGAGGC
WRC1019	TraesCS6A01G205000.1	chr6A	357872215	CAGATCAAGGTGTGTCCTTTCTCTCATACATGCCCAACTAAGCTGAGAAGTGA[C/G]AAGTTCAAGCCGGCTAAGAGTAGGTGGGTTGCTGATGTTATCCTAGATTGGGCTAGAAAGAACCCAGACATTGGCCCTACTGCTCTTCAAGAGAAGATCGAGGAGAAGTATCACTTCACGGTGTCG	CCAACTAAGCTGAGAAGTGGC	CCAACTAAGCTGAGAAGTGGG	CTCCTCGATCTTCTCTTGAA
WRC1020	TraesCS6A01G209400.1	chr6A	378453011	TCGGGGCGGCAAAACATAGTCGAACTTGAGATGGTCTTGACGATCCCAAAAACGCTCCTGCTCAAGGAGGTCTCTGTCTCGGTCTTCACCGGTCGTGGTACTTGGCGAA[A/C]GGGATCCACGAATGCGATAGTCCTCGGACTTGAGGCTTCGTGCC	CTATCGCATTCGTGGATCCTT	CTATCGCATTCGTGGATCCTG	GTCGAACTTGAGATGGTCTT
WRC1021	TraesCS6A01G231800.1	chr6A	438491147	AGAGCAGGACTTGGCGGAAACCCCGAAGGCGCTGCTCGTTGGACTTGTGACAGAGGTCA[A/T]CAGAGAGGTCGAGAACTTCCTCTGGCGTGAGGCAGCGGTGGAGACGCGGGAAGGAGGACTCGGGCAGGAATTGGTTAGGCAGCACGAGAGGC	GGAAGTTCTCGACCTCTCTAT	GGAAGTTCTCGACCTCTCTAA	GCTGCTCGTTGGACTTGT
WRC1022	TraesCS6A01G241900.1	chr6A	453685847	CTCGGAGGTGCGGCAGAAGAGGCCGGCTCAGTGCGGTACAGCGCGGGCGATGCTTCAAGGCAG[T/G]GGCGACGCAACAGAAGCGGGTTGAGGCAGAGGCGGCTGCAGCCCGGGCACAACAGGAGCAGAGTGAGGC	GGCGATGCTTCAAGGCAAT	GGCGATGCTTCAAGGCAAG	CTCACTCTGCTCCTGTTGT
WRC1023	TraesCS7A01G292600.1	chr7A	367837809	GCGGCGGCGTGCCAGAGTCTCTTGGGCTCCCGTCCCCTGTCATAATCAAATCACA[A/G]CCACAACCGACGAGGCTTCAGTTAACATTCCCAACTTATTGGCCAATACAACGATAATCAG	CCTGTCATAATCAAATCACTA	CCTGTCATAATCAAATCACTG	GGGAATGTTAACTGAAGCCT
WRC1024	TraesCS7A01G301600.1	chr7A	420671657	AGATAACCACAATGTTGCTTTGGGTGACAATGTTGCAGTACATGCTGATGTTGCAGTCAATGC[A/C]GTTGATCATAATGTTGCAGTACAACCAAATGCTCCTACGAACAATGATGCCAATGATCATAGTACTGTGCCTGGACTGCCTCCTGATAATGATATGAACAGCAA	GCTGATGTTGCAGTCAATGTA	GCTGATGTTGCAGTCAATGTC	ATTGTTCGTAGGAGCATTTG
WRC1025	TraesCS7A01G328300.1	chr7A	477186540	GGAGCCCTACGCGTTCTGGAAGGGCAACCCCGACGTCTCGCCGGTGCGCCGCGA[T/C]CTCTTCCGGTGCAACAACGACTCCGCCGCCGGCAAGGAATGGAACGTGCGGGCGTTCAAGCAGGA	CGTTGTTGCACCGGAAGATA	CGTTGTTGCACCGGAAGATG	GCGTTCTGGAAGGGCAAC
WRC1026	TraesCS7A01G541100.1	chr7A	717811405	AGGTGGAAGCCCGTGAAGAGTTTCCATTATATACTGCGAGCAAGGATCTCGCTCCCCATAGTGTGACTGAAGAGAATGTCATGAACAAGACAGATGGTAAATTGGTGGATGAGG[G/C]GAAAACAGCATGCCATACTGTGACTGAAGACAATGTCATCAATAAGACAGATGGTAAATTGGT	TGGTAAATTGGTGGATGAGAG	TGGTAAATTGGTGGATGAGAC	TGACATTGTCTTCAGTCACAG
WRC1027	TraesCS7A01G799800LC.1	chr7A	732003473	TCAAGAACGCCAACAACGACAAATCCGCCTGCAACCTCAAGAACGTCAACAATGGCAAATCCATACGCAGCCTCAAGAATGTTAGCA[A/G]CATCAGTAGCGGTGGCTCCTTCTGCGACCTCAAGAATGTCAACAAGAGCCGCTCCATCCACGACCTCCAGAATGTCAACTAGAGCAACGGTG	GGAGCCACCGCTACTGATCT	GGAGCCACCGCTACTGATCC	AACCTCAAGAACGTCAACAA
WRC1028	TraesCS7A01G808600LC.1	chr7A	735140293	GCCGCAACTACCACCACCGATAGGCGCGTCGCGTGCAACTGCGTCAAGAGCTCAAGGAA[C/T]CGAAGCCAGCCACTCACGCTAGAGCGATCAGACCGCTAG	GTGAGTGGCTGGCTTCCG	GTGAGTGGCTGGCTTCCA	CAACTACCACCACCGATAG
WRC1029	TraesCS1A01G049000.1	chr1A	30636156	TACACTCCCTCTGACTGGATGTCCAGAATGTGGAAGAGAAT[G/C]GTGAAGCAGTCAGCGACATCTCTGAATCCGGGCAAATATTCAGTGGAATGCCCAAGGAATGGCAAGGATATGAAGGTGAAA	GATGTCCAGAATGTGGAAGAGAAAG	GATGTCCAGAATGTGGAAGAGAAAC	GGCATTCCACTGAATATTTG
WRC1030	TraesCS1A01G123000LC.1	chr1A	75736191	GAACGCTTCAATACCTGCATCCAGCATCGGTTATCTGAACTCGAAGGGTTACCATCTACT[T/A]GGGGTGAAGATTTGCAAATGAAGTGTTTACTCGAATTATATGGGCTCAAG	GAACTCGAAGGGTTACCATCTACCT	GAACTCGAAGGGTTACCATCTACCA	TTGAGCCCATATAATTCGAG
WRC1031	TraesCS1A01G340400LC.1	chr1A	371219900	AGCGCCGCCGGCTCCGACGGCGTCAGGTACAGCGGGCTCGAGTCGGACAGGATCGGGAAGG[C/A]GTGCTGCTTCCACGGCAGGTGCACCGACGGGTTCTTGTGCTGCCACCGCAGCAGGTCGCTCGTCTTCTCCAGCA	CGGACAGGATCGGGAAGAC	CGGACAGGATCGGGAAGAA	GGAGAAGACGAGCGACCT
WRC1032	TraesCS1A01G379600.1	chr1A	551540229	TATCCTGGACGACCTGTTGCAAACATGTGTTTCAAGGTATATGGCCACGTT[G/A]CCCCTCGTCAAGCTCTAGCATTTCTGCAAGATTTTAAGTTGGGCCACTACATGAAGATTCCCCCAAGGACCATGTT	TGCTAGAGCTTGACGAGGGTC	TGCTAGAGCTTGACGAGGGTT	GCAAACATGTGTTTCAAGGTA
WRC1033	TraesCS2A01G416900LC.1	chr2A	472414544	AGCCGGAGGACAGCAAGAGGCCCATCTCCGAGATCGACGCCGAGATAGAGGAGGAGTGC[A/G]GGATCTGCATGGAGCTCAACAGCAGGGTCGTGCTGCGCAACTGCAGCCACGACATGTGCATCAAGTGCTACCATCAATG	CCGAGATAGAGGAGGAGTGAA	CCGAGATAGAGGAGGAGTGAG	ACTTGATGCACATGTCGTG
WRC1034	TraesCS3A01G016700LC.1	chr3A	10351689	TCTGACGGAGAAAAAGGAGAACATATTAATGAATCATCTATTCACGCTGAGAGTACAAGGGGACACATGCCAAGGATAGG[G/T]TCAACTGATGCTATTGATGTTTGGGCAAATCAGCACAAAGATAAAAAACTGTACATAGTGCTAATA	GGACACATGCCAAGGATAGAG	GGACACATGCCAAGGATAGAT	ATTTGCCCAAACATCAATA
WRC1035	TraesCS3A01G176700.1	chr3A	198034564	CAAGTTCAGAATTTTGGAGAACCTTTCTTTATGGTTATTCGTGAGGATGAGACCTTATCTTCTATTAAAGAACGTTTACAGAAAAAGCTTAAGGTC[T/C]CAGATGAGGATTTCTCCAAGTGGAAATTTGTGTACATATCCCTTGGT	CCACTTGGAGAAATCCTCATCTTA	CCACTTGGAGAAATCCTCATCTTG	TGGAGAACCTTTCTTTATGG
WRC1036	TraesCS3A01G244700.1	chr3A	457890562	ACTACATTATGCAGAACACCATGGGCGCGTCCCGCGACACCCAGCTCCGGATGCTTGCCATCTTCAAG[A/G]CCATACTGGCCAACCTGCACGGCAAGGAGGACATCTTCGCCTTCGGGCACGACGTGATGACGGCCAAATGGCGCAAGC	GATGCTTGCCATCTTCAACA	GATGCTTGCCATCTTCAACG	GAAGATGTCCTCCTTGCC
WRC1037	TraesCS3A01G436600LC.1	chr3A	541259804	TGTTATCATTCACTTCAGTTTTGTAACTGCAGCATGTATGGCATCTGC[A/G]AGATGGGGTACAGTCCTGGAGCTCAAACCAGCCATGCTGATCCTCC	GCAGCATGTATGGCATCTGAA	GCAGCATGTATGGCATCTGAG	GGTTTGAGCTCCAGGACT
WRC1038	TraesCS3A01G536900.1	chr3A	748849146	GCACCATGGGAAGTCAATGCTTTGAGAGCTATAAGAGGCAGCTTGAGTGATCCAAATGGATTTCT[C/T]AACAACTGGAACCGTGGAGATCCATGCGTCGCGAATTGGACCCGTGTTATCTGTTACAA	CTCCACGGTTCCAGTTGTGG	CTCCACGGTTCCAGTTGTGA	ATAAGAGGCAGCTTGAGTGA
WRC1039	TraesCS4A01G171600LC.1	chr4A	215247869	GAGCCAGTTCAATGCCGTGATCCTGAAGCGCCTCTTCATGAGCAAGACCAACCGCCCGCCGCTCTCGCTT[T/C]GTCGCCTCGTCAAGTTCATGGACGGCAAGGATAACCAAATCGCTGT	CATGAACTTGACGAGGCGAAA	CATGAACTTGACGAGGCGAAG	CTCTTCATGAGCAAGACCAA
WRC1040	TraesCS4A01G306700LC.1	chr4A	449267601	CTTGATGTTGGGCAGGGTCATGAAGTTCTTGGAGAGATGGACAACAAGCTTGTCCATGAAAGCAGG[A/G]GCGATGTAGAAGCCTCCCATGGTGTTGTCGAAGTCGTACTTCTTGAGTCCCTGGCTGACGTACTCGTAGGAGCTGAGGACGGCCTCGTGGGTGCCGTCGCCCGTGGGCGCCTG	AGCTTGTCCATGAAAGCAGCA	AGCTTGTCCATGAAAGCAGCG	CAAGAAGTACGACTTCGACA
WRC1041	TraesCS5A01G040900LC.1	chr5A	25120131	TACAGGATTCAGAGGGGCACGCGGCCAAGCTGAATTCCTTATGCACGTGGTTGA[A/G]AATGCTCCTGCAATAGAGGTCGTGACTGTAGATACAGCTCAAAGGCTAACTGATGCTTGGGATCCAGATGAACCAATT	TTCCTTATGCACGTGGTTGTA	TTCCTTATGCACGTGGTTGTG	ACAGTCACGACCTCTATTGC
WRC1042	TraesCS5A01G206200.1	chr5A	416169029	AACGGACGAAGGGGGCTCCGGCTCCGCGACGACCCTGGCGGAGTTCAAGCGGATGGTCGACGAGTGGTTCTTGCTCAACGGCGTGCTCAACAT[C/T]GGCGACTCCATCCCGTGGCTGGACTGGCTGGACCTCCAGGGGTACATCAAGAGGATGAAGAAGCT	AACGGCGTGCTCAACAGC	AACGGCGTGCTCAACAGT	GCTTCTTCATCCTCTTGATGT
WRC1043	TraesCS5A01G455400LC.1	chr5A	532807041	AAAAGCAGTGGATCTGATTTCCAAAGATCTGAAGCTGGTTCAGATGATGAGGA[C/T]GACTACCCGATGGATGGAATTGATCCTTCTATGAAGTCTGTTGGAATTAATT	GCTGGTTCAGATGATGAGGTC	GCTGGTTCAGATGATGAGGTT	AACAGACTTCATAGAAGGATCAA
WRC1044	TraesCS5A01G402400.1	chr5A	595037572	CTTCTCAGCAGCCTCGTGTAAGGAGACTCCGGCATCAGAGCCTCCTCATCCTCGTC[G/A]ATCTCTTCCTGCGTTTTCGGCAGCCCATCAGGGACGGGGAAAGGCCTCGGCTTCGCTGTTTGCCCCGGGGAGTTTGA	AGAGCCTCCTCATCCTCGTAG	AGAGCCTCCTCATCCTCGTAA	GCAAACAGCGAAGCCGAG
WRC1045	TraesCS5A01G537200.1	chr5A	693657713	AAGGGCGGCTGGAAGGCTACGGTCAGCTGTTCGTCGTCTCGGAGGATCAGAAGCTCGACTGGGC[C/T]GACATGCTCTTCCTCTACGCACAGCCACCCGAGATCAGGAAGACC	GATCAGAAGCTCGACTGGGAC	GATCAGAAGCTCGACTGGGAT	CTTCCTGATCTCGGGTGG
WRC1046	TraesCS6A01G068400LC.1	chr6A	29401939	TTAACTACGTGCTCGTCTGCGGGGTGCTTCTGGTGGTCT[C/T]ACTCTTCGAGCACTTCTGGAGGCTGCTCAAGTGGTTCGCCGTGGCGCACCATGGACGTCAACATACTCATGCTC	GGTGCTTCTGGTGGTCGC	GGTGCTTCTGGTGGTCGT	GTATGTTGACGTCCATGGTG
WRC1047	TraesCS6A01G193800LC.1	chr6A	117056843	AAATGCAGCTCCAGACCTTCAGATCTTCAGTCAAGCAAAAGCTGCTGGTAAAGAAGTGTTTAAGGTTATCAAAAGAAATCCAGTGATAAGTTCTG[G/A]ATCAAATGGAAGAATATTGGAGAAGGTCATTGGTGACATTGAAATACGAGAGGTGCATTTCACATATCCATCCCGTGAAGAT	TCTCCAATATTCTTCCATTTGAGC	TCTCCAATATTCTTCCATTTGAGT	AAGCTGCTGGTAAAGAAGTG
WRC1048	TraesCS7A01G118600LC.1	chr7A	50066343	GAGAAGCTGAAGATCTAGTGGAGCAGCTAAGTATCCCATTACCAAATTCAGAAAATCTATGTTTCTCCCATAGTTTTGCACA[T/G]AATGGCTGGATTCAACTTAAAGCTTGCTTGTGGAAACAAAACATAACTTAC	TTAAGTTGAATCCAGCCATCA	TTAAGTTGAATCCAGCCATCC	ATCCCATTACCAAATTCAGA
WRC1049	TraesCS7A01G261700LC.1	chr7A	161688438	CCATATTGGGCAAAACAGGAGTTATCAAACCAGGTTCACAGGAG[G/A]GTTTCTAGGCATTTATGATTCTGGCGTTGATGATTGCTCAAACCC	ATCAAACCAGGTTCACAGGATG	ATCAAACCAGGTTCACAGGATA	CATCAACGCCAGAATCATA
WRC1050	TraesCS7A01G375300LC.1	chr7A	307380049	GATGTCAGTGATAATGAAACCTCCCTCATCAACAGACCCATGGATGTCAGTGAAAATCCC[T/C]AAGATGCTCTCTTCTTACAAGAGCCCAAACCTGAACCTGAAATTGATATTCCAGCT	TCTTGTAAGAAGAGAGCATCTGA	TCTTGTAAGAAGAGAGCATCTGG	CAGTGATAATGAAACCTCCC
WRC1051	TraesCS7A01G623800LC.1	chr7A	635493677	ATGGTCTGTTTATCCTGCCTCAGTTGTGGACGTCGCCCTTCCGTTTCGTGGTGGTGCTTCGGGGCC[T/G]GGCTGACCTGTTGTTGGTCCTTGGCAGCTGCCTGTCCTCCTGCTCTTGCTTGG	AAGGACCAACAACAGGTCAGCTA	AAGGACCAACAACAGGTCAGCTC	GTCTGTTTATCCTGCCTCAG
WRC1052	1BS29M	chr1B	66723975	TGAAGGAGGGAAGTTGCAGTGGCGGCGACAGTTCGTGGATGTGGGCG[R]CACCCTCGTGCGGACTACATGGATGTGTTTCTTGGCTAGGCGATGGCCTCGTTGAAGGSGGGACCTGC	GTTCGTGGATGTGGGCGG	GTTCGTGGATGTGGGCGA	GCCAAGAAACACATCCATGTAG
WRC1053	AX-95161958M	chr1B	96319287	ATAACAAGCACACATAACG<A>ATA<G>TTTATAAAGTA<GTA>CAGTAGCCACCG[Y]CATCATGAATTACCTGCCAGAGT<C>TTCACCTGTGTCATGAGTTAAGTGTG	GTAGTACAGTAGCCACCGC	GTAGTACAGTAGCCACCGT	CACACTTAACTCATGACACAGGT
WRC1054	AX-94679613M	chr1B	4.41527e+08	GGGCAAATGCTGAAAA<A>ACAGGTCCTT<C>TTCGGGGAGCATTC<G>TTCTGGA[R]ACAATGCGTGTCAAAGGGG<C>GAACCAAGAAACCGCTGCAAGCAAATCTTA	GGAGCATTCGTTCTGGTA	GGAGCATTCGTTCTGGTG	GCAGCGGTTTCTTGGTTCG
WRC1055	1DL58M	chr1D	477907552	CCAAGCCAACACTTTCAGCTTCATAACGCAYCTGGACCTCCAAATCCGTTTGAAGGGTTCCTGAA[Y]TGTCTGAAGAAATGTGTAGTATCAAGCAGACGTGTACCTAGGCCCCCAGTCATCAGTAGCCATAGTATTGATGCTAGTTTTGGCAGTCTCAA	CGTTTGAAGGGTTCCTGAAC	CGTTTGAAGGGTTCCTGAAT	TTGAGACTGCCAAAACTAGC
WRC1056	2AL111M	chr2A	673007121	ATCTAGAGCCAAGAAATTCCCAAACAAACAAAAAATAAGTAATACCAAGAAGAAATATGGMMATGACAAATAACATAATCCATATGTTACC[M]TGCTATATCCCAGTGTTACAACGTGACRGATGRAGGGATGGCCAATGGTGTGCTAAG	CGTTGTAACACTGGGATATAGCGT	CGTTGTAACACTGGGATATAGCGG	CAAGAAATTCCCAAACAAAC
WRC1057	2AL59BM	chr2A	739713709	TKTTCCGCCCCAAGTTAGATGACGCACACAGGAAGAAGAGAGGAGA[S]TCCTGG<A>ACAAGGCGGTWTCAAG<A>TCATTTGA<C>CTGGCYGACCTTTCTCTCTAGTTTGYTACACCTT	CACACAGGAAGAAGAGAGGAGGG	CACACAGGAAGAAGAGAGGAGGC	TAGAGAGAAAGGTCRGCCAGG
WRC1058	2BS23MR	chr2B	105526658	CTTTGTTGTATGCTATACTCGGTACTGCCAGTACTTATCTTGCACCACATTAATTMA<G>CTCATTGAGTTTTAATCTTTATGTCAT[Y]ATATGTRTTC<TC>TTG<G>TGCA<A>GCAGG<TGTC>AAAGGWCAATTGSAAGACTACCRTGACATGATTTGCACTRTAAGATTGATGGAC	TGCACCAAGAGAAYACATATA	TGCACCAAGAGAAYACATATG	CTTTGTTGTATGCTATACTCGG
WRC1059	AX-94661980M	chr2B	234636667	AGAAGCTGATAAAGTTT<GG>GTATCCTTATTATGTGATGTATTCATCAAAC[Y]GTG<G>TCCTCCGGTACAGATGTTGTGCACTCCTTGGGTAGCTCTTGCGGGT	AACATCTGTACCGGAGGACCAAG	AACATCTGTACCGGAGGACCAAA	AGAAGCTGATAAAGTTTGGGTA
WRC1060	AX-94485004M	chr2D	8169953	GCGTCGTGCTCGTCCGGCATTTCAGGCGCCATTATTGATGACGT[R]CTACTATCAGATAGAGCTTTCTCCTCTTCTTTTCTTGGACCCTCACTGTATTGCAC	CGCCATTATTGATGACGGA	CGCCATTATTGATGACGGG	ATACAGTGAGGGTCCAAGAA
WRC1061	2DL125M	chr2D	591028037	CAGCGGCGCAAATGCGCAGTCCTGGTGGACCTACCCACACGATTAGAA[S]CAACCACGCCGGCGCAACACATGCCGCCGAGCAGTAAGAASGACAAGTTCAGTGAAGCAAGATATG	GGACCTACCCACACGATTAGAGG	GGACCTACCCACACGATTAGAGC	TGCTTCACTGAACTTGTCTT
WRC1062	4DS8M	chr4D	20283655	ACCATTTYCCTTATCCTGGTCTCCTGCAACCCCTGCCTGTCCC<A>GACTTTGCATGGAC<A>CACATC<AGT>ATGGATTTTGTGGAAGGA[Y]TACCTGT<T>TCTGACAACAAAGACCT<G>ATACTKGTRGTAGTTGATAGGTTCACTAAATATGCTCATTTCATTGGCCTT	TCTTTGTTGTCAGAAACAGGTAG	TCTTTGTTGTCAGAAACAGGTAA	CTTTGCATGGACACACATCAG
WRC1063	4DS9M	chr4D	30283655	GATATAAAGGAAAAATCCTCATTGGCAACRKCACRGAACTGAGAGCATCTCTCATYACTTCTTTCCATACATCTGAATTAGG[K]GGCCATTCTGGAGAGAGAGCTACATATCACAGACTCAAAATTCTGTTCACCTGGCCAGGCATGAGACAAGCAGTYAAAAAYTTTGTCCAACAGTGCCCAGTATGTCAAC	AGCTCTCTCTCCAGAATGGCTC	AGCTCTCTCTCCAGAATGGCTA	GAACTGAGAGCATCTCTCATYAC
WRC1064	1AS3U	chr1A	145000000	GTTGCTAGGTCAAATGCAACAAGCAAAATCAGGGGAGATATGAGCATGAACATGSCAGCTGATGCACAAGAATTTTCAGAACTCCGTCAC<ATTC>ATATGGCAAAA[Y]G<C>ACAAGGTCTGAAAGTTCGTGCATGAATGGAGGTGATGCTAACGAAGGTGAAAGTTCAGAGTYAATGAACGATGTATTCTCACCTG	CCGTCACATTCATATGGCAAAAT	CCGTCACATTCATATGGCAAAAC	CACCTCCATTCATGCACGAAC
WRC1065	AX-94441809U	chr1B	354805820	TTACATTTCTGAAGTTCT<C>ATATTAAAGCGACCTGGTTAATCACATTTCC[K]AGC<A>AATATTGCTCATATCAACATGCTATCTGTGGCGCTAATTTTCAGTT	CGACCTGGTTAATCACATTTCTT	CGACCTGGTTAATCACATTTCTG	AGCATGTTGATATGAGCAATATTT
WRC1066	1BL57U	chr1B	522650669	GATCTCTGTGCACTCAAGATCCGGRTCGCCAATCCCATCCYGTGAACTGTATGYCTGCAGATAATTCACTGCTCAAAACCAGAGCTAACACTTTTAATG[Y]ATGTAAAGAATTCTCWGGTAATTCTGYAGTAGCTATTACCTTTACATTTYTGTTCTGAATTCTATGAGCGATTSTTAGACATGTATCTCCCCATTC	AACCAGAGCTAACACTTTTAATGC	AACCAGAGCTAACACTTTTAATGT	AATCGCTCATAGAATTCAGAACA
WRC1067	1BL56U	chr1B	628660920	TGTTGGCTACCATGTGGTGTATAGYAATGTGCAAGCAGGCAGTGGTGATAGATGGCSYGAGGTGGAGCATATTAGACGCTCGATGGCAG[W]GATGGATG<T>GCMGAAGGTGCCTGCTTGGAGCTGTGTTGCKGACACCGGTAGCCCATGATCTGTAYTCTGC	ATATTAGACGCTCGATGGCAGA	ATATTAGACGCTCGATGGCAGT	AAGCAGGCACCTTCKGCA
WRC1068	AX-94995690U	chr1D	66094238	CAGAACAAGTCAGGTAGGAAGAGTGATACTGGGATT<A>GGTTAGGCAAACA[R]T<TG>TTGGTAAATCAGTCAA<A>TAGCCAAAGGTCATCTCGGGATAACAGTAG	GCTATTTGACTGATTTACCAACATT	GCTATTTGACTGATTTACCAACATC	GATACTGGGATTAGGTTAGGC
WRC1069	AX-94465742U	chr1D	250140451	CCCCAGGTGTAATCTTAAGCCAGCTGATGACAGTAGCC<C>GGAGTGTGAAG[Y]GATCATGACAGAG<A>CTAGTAC<A>GAAGAAGGAACACAGGAGGCTAAAATGA	ACAGTAGCCCGGAGTGTGAACC	ACAGTAGCCCGGAGTGTGAACT	CTCCTGTGTTCCTTCTTCTG
WRC1070	AX-94441809U	chr1D	354805820	TTACATTTCTGAAGTTCT<C>ATATTAAAGCGACCTGGTTAATCACATTTCC[K]AGC<A>AATATTGCTCATATCAACATGCTATCTGTGGCGCTAATTTTCAGTT	GCGACCTGGTTAATCACATTTCTT	GCGACCTGGTTAATCACATTTCTG	GCATGTTGATATGAGCAATATTT
WRC1071	AX-94676546U	chr2D	373221529	AGGATCTGACGCTAGGGCTGGAAAGCATTGTGGGAGAATGTAACACTTGC[Y]GACTTGTACA<T>CATTGTACGATTTCACATTCGTACTTAAAATACAATCTT	GTGGGAGAATGTAACACTTGAC	GTGGGAGAATGTAACACTTGAT	GAATGTGAAATCGTACAATGA
WRC1072	TraesCS3B01G030300.1	chr3B	13903746	GGGGACATGGGAAGGGACAGGAAGGCGTGGAAGGACCCGGACGAGTTCC[T/G]GCCAGAGCGGTTCCTGGCCGGCGGCGACGCCGAGGGCGTCGGCCCTCTGCCGGGGCGCA	CCAGGAACCGCTCTGGTA	CCAGGAACCGCTCTGGTC	ACATGGGAAGGGACAGGA
WRC1073	TraesCS3B01G124600.1	chr3B	98072240	TGTAAAGCTTCTTTGGGGCCCTCCAGGGTCTGGAAAGACGCTGGTAATCACCAAGGTTCTCCGCTATTTGCAA[C/T]AATTGTCTATGAGGATTTTTATATGTGTTCCTTCAGAAGACCATGTCCTTTCATTGCTAATGCTTCTTGAAGAATCAGAATATA	CAAGGTTCTCCGCTATTTGCATC	CAAGGTTCTCCGCTATTTGCATT	GAAGCATTAGCAATGAAAGG
WRC1074	TraesCS5B01G510700.1	chr5B	531695981	GGGGGCGACACGCCGATACGCAGCGTGCTGGTCGCCAACAATGGGATGGC[C/G]GCCGTCAAGTTCATGCGCAGCATCCGCGCCTGGGCCTCCGAGACCTTTGGCACCGA	GCCAACAATGGGATGGTC	GCCAACAATGGGATGGTG	AAGGTCTCGGAGGCCCAG
WRC1075	TraesCS6B01G253400.1	chr6B	455075777	CCAATGATTGGTCTGGCAGTGTTTACCTGTGAAGGGTTTG[G/A]GAATGAATTCCAGCTTCCTTACTGGGGAATTATTCTTGCATGCTTGCTTGTACTTCTGTTC	TGTTTACCTGTGAAGGGTTTGG	TGTTTACCTGTGAAGGGTTTGT	CAAGCAAGCATGCAAGAATAAT
WRC1076	AX-95002025B	chr1B	9.52236e+07	ATGCAAATAGAGCTGCACATGCAGTGGCTAGGTTGGGATATTCTTGTGAT[R]TAAATCCTGCCTTCCTGTGGGAGGATGATGTTCCAGCTGTAGCTGCAAAC	GCTAGGTTGGGATATTCTTGTGAGA	GCTAGGTTGGGATATTCTTGTGAGG	TACAGCTGGAACATCATCCT
WRC1077	AX-95217835BIMR	chr2A	277602533	GTGATGTGCAGGTCTGTACTTGCCATAGGTTTCACTTCCATTGGTTTTGG[Y]TGATGA<C>CTGGAGCTCTGCTGCACAATTCCTGTTTCAAGTCATGGCATTG	CTTCACTTCCATTGGTTTTGGC	CTTCACTTCCATTGGTTTTGGT	GTGCAGCAGAGCTCCAGG
WRC1078	2AL59BM	chr2A	739713709	TKTTCCGCCCCAAGTTAGATGACGCACACAGGAAGAAGAGAGGAGA[S]TCCTGG<A>ACAAGGCGGTWTCAAG<A>TCATTTGA<C>CTGGCYGACCTTTCTCTCTAGTTTGYTACACCTT	ACACAGGAAGAAGAGAGGAGGG	ACACAGGAAGAAGAGAGGAGGC	GTCRGCCAGGTCAAATGAT
WRC1079	AX-94734478B	chr2B	80629952	ATCTGCTATTTACTTTTCTGGCGTACAGGTTCACATAAATCTGAGATGAT[W]AGGATTTATCAGGCAGGAGCCATGCCATGCCAGCAAAGAGTTGCAACAAT	GGCTCCTGCCTGATAAATCCAT	GGCTCCTGCCTGATAAATCCAA	TGGCGTACAGGTTCACATA
WRC1080	BS00062783	chr1A	21217309	TGGGGTGACACTAGGGTTTGTTCGCCTCAATCAGGTTAGCAGTGTTTGGG[S]TGTGATGAGTTCAGCTAGGGGCATTTTGCAGTGGCAGGAAGCAGGTAATA	CCCCTAGCTGAACTCATCACAG	CCCCTAGCTGAACTCATCACAC	CGCCTCAATCAGGTTAGCAGTGTTT
WRC1081	BS00072686	chr1A	312756637	GTTCATTTAGTGATGGAGTGACCAGCGGACCATGACCTGATGACCAAGCA[R]TACAGTAGCAACTTTGTGTCGAAGGTACATCAATTACATGAGCGGCTGGA	CCTTCGACACAAAGTTGCTACTGTAT	CTTCGACACAAAGTTGCTACTGTAC	GCGGACCATGACCTGATGACCAA
WRC1082	BS00022158	chr1A	515968049	GTCTTGCAGAGAGAAAAGTGATGTCCAGAACTCCAGGATCGTAGTGCGTA[Y]TGGTGAATCACGCAGCTGGTACTGTATTGTATAATTCTATCTATGATAGT	ACCAGCTGCGTGATTCACCAG	GTACCAGCTGCGTGATTCACCAA	AGAACTCCAGGATCGTAGTGCGTA
WRC1083	BS00023162	chr1B	407429665	ATGCTATTTATATTATTCAAAACTCACTACATCACAAAGCTCAGCTGCAC[W]GCTTGTGGTGTTTCGAATATGTGCATCATGGAGACGTCTTTCTGGAGCAG	ACATCACAAAGCTCAGCTGCACA	ACATCACAAAGCTCAGCTGCACT	CATGATGCACATATTCGAAACACCACAA
WRC1084	BS00065140	chr1B	282000275	GTTATTGATGATTGTTTGGATTTGTTTGGGTAATATTGTAGGTGACAATG[R]CAAGTTGTACGTACCATTATAACTGCGTGCTTGTCGATGATGTCGGCGAT	GTTTGGGTAATATTGTAGGTGACAATGA	TGGGTAATATTGTAGGTGACAATGG	CACGCAGTTATAATGGTACGTACAACTT
WRC1085	BS00073094	chr1B	421152970	CCATGTTTCTGTACAAATAGGCAGGTTGATGTAGTAAAAAAGAATGGTAC[K]AAAGAGCCATGTTTCTGTGCAAGCTGGATTAGAAATGCGGCTGCTCTGCT	TGCACAGAAACATGGCTCTTTC	GCTTGCACAGAAACATGGCTCTTTA	CTGTACAAATAGGCAGGTTGATGTAGTAA
WRC1086	BS00065126	chr1B	539368073	AAAAACCTTGGATTAGGGAAGTATAAACAGCTGTGTCTGGTCGTACTCCC[R]TATCAATCATCTGATTAAACATAATCATAGCATCGTCCAACCTACCCTTT	ATGATTATGTTTAATCAGATGATTGATAT	GCTATGATTATGTTTAATCAGATGATTGATAC	AAGTATAAACAGCTGTGTCTGGTCGTA
WRC1087	BS00076504	chr1B	474925838	CCTGTATGTCCATTTTCCTGTCCCACTTTTAAACAAGCCGCACAGGTCAA[M]TAGGAACTTAACGGGTCCAACCCCCGTCCTTTTCCAACCCGGACAGAAAA	GGTTGGACCCGTTAAGTTCCTAT	GGTTGGACCCGTTAAGTTCCTAG	CACTTTTAAACAAGCCGCACAGGTCAA
WRC1088	BS00077232	chr1B	573688575	CCTTTGTGCACTGATGGTGTGTCCTGCCGGTTTTGCAATGTTGCTATGTA[S]AGCTTTTCAAATGCTGATGGTGAATCTTGTTTATTTTTGCTCAGTATGCA	ATTCACCATCAGCATTTGAAAAGCTG	CACCATCAGCATTTGAAAAGCTC	CCTGCCGGTTTTGCAATGTTGCTAT
WRC1089	BS00072193	chr1D	50706059	TCTTGGCTTCGGGCAGCGCTCCTCTATTCCTAACGGCATGGTGCTCGGCA[K]GGCACAACGGCTTGCGTTGCGTCTAGAAGACCGTTGATGGATGTAGGGAC	AACGGCATGGTGCTCGGCAT	ACGGCATGGTGCTCGGCAG	CTTCTAGACGCAACGCAAGCCGTT
WRC1090	BS00022332	chr2A	40823154	AGCCTGTGATCTCTTACCAGCCTGAACCTGCGATCTGCGTTTGGATAATA[Y]AAATGGATCCCTCCCAATTTTAGTCAGTAGTTAACGGCATGCAATTCTGA	GCGATCTGCGTTTGGATAATAC	CCTGCGATCTGCGTTTGGATAATAT	TACTGACTAAAATTGGGAGGGATCCATTT
WRC1091	BS00022377	chr2A	676238577	AGGTCGGGACTGCTGTTGTCTACGTAATAGAGCCTCTTCTCTGGCAGATC[Y]CCCTGTCTCCACTTGTTCTTCACCATGCCAGCCCAACAAGATGGGACCGT	GAAGAACAAGTGGAGACAGGGG	GAAGAACAAGTGGAGACAGGGA	GTAATAGAGCCTCTTCTCTGGCAGAT
WRC1092	BS00022321	chr2A	754360967	CTTCCACTCAGACTTGACCCACCGGCTTTCCCAACCATCTGATCAGACAA[M]AAAGTTCCACTTAGAACGGCCCAAAATAGCAGATATACAGTAAACATTAC	TGGGCCGTTCTAAGTGGAACTTTT	GGGCCGTTCTAAGTGGAACTTTG	GCTTTCCCAACCATCTGATCAGACAA
WRC1093	BS00071171	chr2A	764668344	GACCTGCCTCTTCGGAAGATCGAGCTGTCATGGCGTTGTTGCATCTTCTT[S]AGCCTGCCTAAGTGGTTTGGAGAACTGAGGAACCTCTGCATTCTAAAGAT	CCAAACCACTTAGGCAGGCTG	CCAAACCACTTAGGCAGGCTC	CTGTCATGGCGTTGTTGCATCTTCTT
WRC1094	BS00081871	chr2B	12020857	TATTCTTCATGTCGACACGAAGCAAATACTGGATTTCACGCACTAGTCGA[M]GGTCCACCACCAAGTCATCATTTACGACTAAGAAGACAACATCGTCTTGA	AAATGATGACTTGGTGGTGGACCT	ATGATGACTTGGTGGTGGACCG	GAAGCAAATACTGGATTTCACGCACTA
WRC1095	BS00110268	chr2B	29031938	AGAACTAAATTCAGAAAATTACAAATTACTCCTTTCTGATCTAACAAACA[S]TATTGTTGCCGCAGATGCCTCCCTTGCAGATCAGGCACGTGTAGCATGAC	AAATTACTCCTTTCTGATCTAACAAACAC	AAATTACTCCTTTCTGATCTAACAAACAG	GGGAGGCATCTGCGGCAACAAT
WRC1096	BS00104020	chr2B	122383665	TTGTAGAAGTAGAATGTACTAATCAATGCTCTATCTTCAGATTTTGTTGC[R]CCCTTTACTGTTAGTTGGATTTCAATGTGAACAGTCTCCATCGACACAAT	CAATGCTCTATCTTCAGATTTTGTTGCA	AATGCTCTATCTTCAGATTTTGTTGCG	GGAGACTGTTCACATTGAAATCCAACTAA
WRC1097	BS00059315	chr2B	138536951	TTCTTACGGAAGAGGAGGACATCATCAGAGTGCTTCCATATGCTCAAGGG[K]TGCAGAAGTTGCATGTGTGGCGACGTATGGACAGAGAAGTTGATGAGATG	GCCACACATGCAACTTCTGCAC	CGCCACACATGCAACTTCTGCAA	GAGGACATCATCAGAGTGCTTCCAT
WRC1098	BS00022563	chr2B	734048576	GTAGTGTGTGTACATACGTTTGGTCATCCTGCGATTGCCATCTGGTTTTA[S]TCTAAGAATCCTCGGTTACTAGCACTGGTTACTTCAAAGCCATGAGCTAC	AGTAACCGAGGATTCTTAGAG	GCTAGTAACCGAGGATTCTTAGAC	TCATCCTGCGATTGCCATCTGGTTT
WRC1099	BS00023124	chr2B	683046880	TCACTTGAAAACCTTTTTATCAGTTCTTTCCCAGAAAACCTGCAGTCCTT[Y]GCTCCTCAAGGCCTTCTCTACCTAAAAAAGTTAAGTCTATTTGGTGGCCC	AGAGAAGGCCTTGAGGAGCG	GTAGAGAAGGCCTTGAGGAGCA	CTTTCCCAGAAAACCTGCAGTCCTT
WRC1100	BS00059043	chr2D	13542875	TTTGCAATCTTGATGACTATTGCGGTGATGAGAATAATAGCTAGGACCAA[S]AACATAGTGCCAATTGTCAAGTCCATGCTGCTATGGTTTGTAATTATGTT	GGACTTGACAATTGGCACTATGTTG	GGACTTGACAATTGGCACTATGTTC	GGTGATGAGAATAATAGCTAGGACCAA
WRC1101	BS00063632	chr2D	13427785	GAACATACCACACTCTGACTAACATCGTGAAATCACGTCACCGATATAGC[K]ATACATGGTTACAACACTTCTTTTGATTCAAGGTCCGGCGCGTGTCTTGG	GAAATCACGTCACCGATATAGCG	GTGAAATCACGTCACCGATATAGCT	CGGACCTTGAATCAAAAGAAGTGTTGTAA
WRC1102	BS00020492	chr2D	222648115	AGCTTATGTGCTGTTATGTTCTGTGGAACCTGCCCTATGCTTACCTTGAT[R]GTATCTGTTTGCACCGTCAAATTTTGCTACCTTCGTTCTGTGGCTGAACC	AACCTGCCCTATGCTTACCTTGATA	CCTGCCCTATGCTTACCTTGATG	GTAGCAAAATTTGACGGTGCAAACAGATA
WRC1103	BS00067189	chr3A	531107122	TACGCGCTTGCACAACTGCTTGTTCATGTAAAAAGTCGTGAAAGGAAAGG[S]TAATTCATGCGTCTACCTGTATAAGGACCAGTTTTAGTATGTGGATGTTG	TATACAGGTAGACGCATGAATTAG	CTTATACAGGTAGACGCATGAATTAC	CGCTTGCACAACTGCTTGTTCATGTA
WRC1104	BS00070511	chr3A	560680632	CAGAAAGAAGCTTGTTCTCGTGAAAACTTTGCTCAGCTTAGCATCCCCAT[Y]TGTTCTGTAGCTTACAATTGAATAGTACCTTGATATTATCAAAGTTGAAT	CAGCTTAGCATCCCCATC	TGCTCAGCTTAGCATCCCCATT	CAAGGTACTATTCAATTGTAAGCTACAGAA
WRC1105	BS00022675	chr3A	NA	ACCACACTCCTCCCTTACCATTTGTCCCAAGCATGCAAATGTGGTTTACT[S]CTTCCCTTGCTTAAGGATTCAGTTCCGACTGGCATGAGATGGCCATCTCA	CCAAGCATGCAAATGTGGTTTACTC	CCAAGCATGCAAATGTGGTTTACTG	CGGAACTGAATCCTTAAGCAAGGGAA
WRC1106	BS00011929	chr3A	530573422	AGTAACAGCATAGTGGAAGCTCAAGACAATGATACATTGACAGAAAAGAT[Y]GCCAAAGTACCGGAATCCGCTTCATTAATACCTTCCGGAAATGCAGGATC	GCGGATTCCGGTACTTTGGCG	AGCGGATTCCGGTACTTTGGCA	GAAGCTCAAGACAATGATACATTGACAGAA
WRC1107	BS00109700	chr3A	649811130	TGCCATTGTCCTAAAAAGATAATAAATATAGATATCGCCACGGTGTCACT[Y]TGGTTTAACGGGGTGCATCGCCGGGACATTTAAAGACTTTGGTACTAGCA	AGATATCGCCACGGTGTCACTC	ATAGATATCGCCACGGTGTCACTT	CCAAAGTCTTTAAATGTCCCGGCGAT
WRC1108	BS00038664	chr3A	642959183	CCTTGAGTGTGTGTAGATGCCACCAACCTCTACCCTGGTACTCTGTAGAA[R]CAGTGACCTTGAGTTTGTATTATAGGTTAATAGGTTTACATATTCTTGTG	CCTATAATACAAACTCAAGGTCACTGT	CTATAATACAAACTCAAGGTCACTGC	ACCTCTACCCTGGTACTCTGTAGAA
WRC1109	BS00011231	chr3A	685357846	AAGGAGTTCATTTCTTGTTATGGCGAGATTATAGATGGCAAACGTGATAC[R]TGGGGGAAAACTGTTGGCTGTGGGGAAGAAATCGTGGTCAGCGATGACGA	AGATTATAGATGGCAAACGTGATACG	GAGATTATAGATGGCAAACGTGATACA	CGATTTCTTCCCCATAGCCAACAGTT
WRC1110	BS00022242	chr3B	41071277	CCTCTTCCTATCAGACAGCCCAACAGCTGAGCAACTGGATTCGCCGTCGC[M]GGTATGTTTCTTCAGCACATCATCGCCATCCGTTGATCCAAGCCCCTTTT	CGATGATGTGCTGAAGAAACATACCT	GATGATGTGCTGAAGAAACATACCG	GCCCAACAGCTGAGCAACTGGAT
WRC1111	BS00003262	chr3B	483983251	TCATTCGAGGAACACGTAGGAGCCAACCTTTTGTACCTGGGAGTCGAAAC[S]AATTTCTGCCTTCTGCATTATTTCAGTGTTAAAGATGATGATTGCATGCC	GAAATAATGCAGAAGGCAGAAATTG	CTGAAATAATGCAGAAGGCAGAAATTC	CAACCTTTTGTACCTGGGAGTCGAA
WRC1112	BS00039734	chr3B	484287755	AAGACAAAAGGATGGTAGGGACATAAGTCGAATTATGAGCAGTGCGAAAC[Y]GGGTCAAAGCGACTTATTATCACCAGCAACTGAAAAATTTCATTTTCTAC	GTGATAATAAGTCGCTTTGACCCG	GGTGATAATAAGTCGCTTTGACCCA	ACATAAGTCGAATTATGAGCAGTGCGAAA
WRC1113	BS00022099	chr3B	555683071	ATTGCCAGATGCTGTCATGCTGTTATCGTTTTCAAACAATTCTGCATCAA[Y]GTTCAGGGTTGCTACAGCTGAGCCATTGTTCTTCATATTTGCTTCAGCAG	CAGCTGTAGCAACCCTGAACG	CTCAGCTGTAGCAACCCTGAACA	GCTGTCATGCTGTTATCGTTTTCAAACAA
WRC1114	BS00039735	chr3B	484288493	TTCATTAGACATTAGACACTAGCTGTAGCCAATTTTTGCATCACACATTG[S]TGTTAATATTACTACTGCTGACATTGATGCGTCTACCAGTCAGTACTGCA	ATCAATGTCAGCAGTAGTAATATTAACAG	ATCAATGTCAGCAGTAGTAATATTAACAC	AGACATTAGACACTAGCTGTAGCCAATTT
WRC1115	BS00094271	chr3B	580914030	TACATGTTGTAGCGAGGGTGGTGATTTTTCTGGATATACAGTGAATGTCA[Y]CGTCACAATGGCGGTGTTATTACTACGCTAGTACTCCCTCATATTGGATG	AATAACACCGCCATTGTGACGG	AGTAATAACACCGCCATTGTGACGA	GGTGGTGATTTTTCTGGATATACAGTGAA
WRC1116	BS00068303	chr3B	552629967	AAGCGGTGTCCGGTTAATCTCGGGCACGGCGCGTCACGGCGCCACTCGGT[W]GGTTTTATAAAATTCAGAACAGACCCTGTCACCCCAGTGCGCGATATGTC	GTCACGGCGCCACTCGGTA	GTCACGGCGCCACTCGGTT	GGTGACAGGGTCTGTTCTGAATTTTATAA
WRC1117	BS00105299	chr3B	498892829	GGTCCTCGTCTTCCTGGTGCACCGGAAGGGCCTGAGAAACAGCAGATCTG[Y]CCATGGCTGCGAGTTTCTTGTTTCTGCGATGAACCTCAAGGAGAAAGGCG	GCCTGAGAAACAGCAGATCTGC	GGCCTGAGAAACAGCAGATCTGT	GCAGAAACAAGAAACTCGCAGCCAT
WRC1118	BS00022403	chr3B	744228349	CAGAGCTTAAGCTGTTCAACTCACTGATAGCACACCAGTCAACGCTCCCA[R]CCTCGCTGAAGCACCTGGGTTTGAACAACATTTCTTGGAGGCCGAACATC	CCCAGGTGCTTCAGCGAGGT	CCAGGTGCTTCAGCGAGGC	CAACTCACTGATAGCACACCAGTCAA
WRC1119	BS00070210	chr3B	776779482	GTAGTTCTCTCTTTAGCCTGTGTGGCATATGTAGACAACCTTTAGCCATA[K]AGAAGTGTTTTCTTAGGGTGGAATTGCTTAGGAAGACGGTAGGAATTTAT	CATATGTAGACAACCTTTAGCCATAG	GCATATGTAGACAACCTTTAGCCATAT	CTAAGCAATTCCACCCTAAGAAAACACTT
WRC1120	BS00037871	chr3B	794518225	CTTGAACGATGCAGAAGTGTGCTGGCTATGAGACTCACAGTCTTCGTGGG[Y]GTGAGTGGCTGAATTCAGGTCCCTTGATTCTCGTGTAGATTATCAGAGAG	GACCTGAATTCAGCCACTCACG	GGACCTGAATTCAGCCACTCACA	TGCTGGCTATGAGACTCACAGTCTT
WRC1121	BS00022441	chr3B	805777454	ACAGAGCTAGTAAGCAAACTAGCAATCAATCGCTTGAAAACCTGCCCTGC[R]CACCCTTGTTCCCTCAAGTAACTCCGATTCCACAAGCACGGCAGGTGTGC	AGTTACTTGAGGGAACAAGGGTGT	GTTACTTGAGGGAACAAGGGTGC	GTAAGCAAACTAGCAATCAATCGCTTGAA
WRC1122	BS00071182	chr3B	822499609	AGATCGTCTGTAATTTAGCTCGCTCCTGATATGATTCCGTCTACTGTTGC[Y]AGCAGAGCAGACATGATAGACTTGCCGCATTTTTTCAAGTCAAGTTTCGC	AAGTCTATCATGTCTGCTCTGCTG	CAAGTCTATCATGTCTGCTCTGCTA	CTCGCTCCTGATATGATTCCGTCTA
WRC1123	BS00048620	chr4A	3799512	GTGACAGCATTGGCATCGGGTCATCAATAACAGCAGTAACTGCACCATGC[R]CGACGGCTGGTGGCGACCTGTTCATCACCATGACTTGTTCCTCCTGCTGC	ATAACAGCAGTAACTGCACCATGCA	ACAGCAGTAACTGCACCATGCG	CAGGAGGAACAAGTCATGGTGATGAA
WRC1124	BS00054025	chr4A	705732401	CAAACACACAGCAGACTGCATCTCCGATATCACACCTGAACCGCTACAGC[S]ACAGAACTGACAAAAAGAACAGAAATCCATCAGTGCTTGGACCTCGGCGA	GATTTCTGTTCTTTTTGTCAGTTCTGTG	TCTGTTCTTTTTGTCAGTTCTGTC	TCCGATATCACACCTGAACCGCTA
WRC1125	BS00023204	chr4B	655704215	GGCGGCGACGATGACGAGCTGGCCAGTGCAATCTCCGTGGACGACAACCG[Y]GTTGGCCTGCTGTACAAGCACGTGTTCCCGCCCATATTGGCTCCTCACAT	CCGTGGACGACAACCGC	AATCTCCGTGGACGACAACCGT	CACGTGCTTGTACAGCAGGCCAA
WRC1126	BS00022808	chr4B	651991530	CTTGATAGAGCAGGCATCAACGTTGCATAAGTTTCTTGAAGACAAGGAAT[R]CTACATTATGTAGTCCCATTCTGGTTCATGTATTGTATTGCTAATTATGA	AACCAGAATGGGACTACATAATGTAGT	CCAGAATGGGACTACATAATGTAGC	CGTTGCATAAGTTTCTTGAAGACAAGGAA
WRC1127	BS00021722	chr4B	590983338	GAGAATATATGTGGCAAGATTAGTCGTGAATAGGCTGGTGATGATGTGCG[R]AAGATGATTGAGGTGTTTGCTGACATCCGTTCCAGTGACCCTGGGTTCAC	AATAGGCTGGTGATGATGTGCGA	ATAGGCTGGTGATGATGTGCGG	CGGATGTCAGCAAACACCTCAATCAT
WRC1128	BS00074787	chr4B	544296480	AGAAACTCTAGTTACGCATATTTCCCGGTGTTAGATAAATTCCAGTTAAC[R]ATTCATGGCTGATCAAACTAAATAGAATCGGACTTTGTGGTACAGTGAAC	CCGGTGTTAGATAAATTCCAGTTAACA	CGGTGTTAGATAAATTCCAGTTAACG	GTCCGATTCTATTTAGTTTGATCAGCCAT
WRC1129	BS00106143	chr4B	604204102	CTCCGGTGACGATGAGCCCATACTGGGCCATGCAGACCCCTAGTCGATGC[M]GGACCTATTTCTCTGGCTCAATTCGCACGCCATGTTTTGTTGCAGCAATT	GAATTGAGCCAGAGAAATAGGTCCT	AATTGAGCCAGAGAAATAGGTCCG	GCCATGCAGACCCCTAGTCGAT
WRC1130	BS00023046	chr4D	455342184	GCAAGACTGGCGCACTTTAAGAACCCCGAGGACACAAAAAATGTCGTTGT[Y]AGTACCGTGAGTCGAGGGATAGACGAACCTTTGCCTGACGTGGTTATTTT	ATCCCTCGACTCACGGTACTG	CTATCCCTCGACTCACGGTACTA	CCCCGAGGACACAAAAAATGTCGTT
WRC1131	BS00038972	chr5A	35258984	CCTTAACTCGAGTTCTCTACATCTGCTCTATCGACTGACAGCGGCGGAGA[S]TATGGACATCACCATTGTCTGTTCTTCAGTGCACAAACAAGATACGCCAT	GACTGACAGCGGCGGAGAC	GACTGACAGCGGCGGAGAG	TGAAGAACAGACAATGGTGATGTCCATA
WRC1132	BS00077990	chr5A	46234071	CTTTTATACCTCCCAGGGGCCATATGAGTCATCGTTAATTTGCTGCCATC[R]TGTATTTTCGTTTCGTCTGTCATGTAGCTTAAGAACATATACCTCCCAGG	GAGTCATCGTTAATTTGCTGCCATCA	AGTCATCGTTAATTTGCTGCCATCG	TCTTAAGCTACATGACAGACGAAACGAAA
WRC1133	BS00058591	chr5A	459003197	TAGGAGGAGAGCAGCAACAGGGCTCCCTCAACTCATGTACGTTCCCGCCT[Y]CCATGGACTACGGCGCATCGTTGTCGCTGGCGCCTCCGTTGTTTCTATCT	AACTCATGTACGTTCCCGCCTC	CAACTCATGTACGTTCCCGCCTT	GACAACGATGCGCCGTAGTCCAT
WRC1134	BS00029413	chr5A	548626243	ATCAGGAGGCTTCTCATCAGCATGCTCTCACAAATTCGGCCACACCAGCC[Y]CCTCACACTTGGAAGGTGCATAGCCTAATTGCTGACATCAGGGCACATCT	CAAATTCGGCCACACCAGCCC	ACAAATTCGGCCACACCAGCCT	CAGCAATTAGGCTATGCACCTTCCAA
WRC1135	BS00072754	chr5A	575702531	AGATCACATAGAAGTGGCGCATCGCATTACGCTTTGAAATCACGAATTCC[W]CCATGATCTGTTTATTCTTCATATACTCATCCTCATGAAGCTGTACCTCC	GAGTATATGAAGAATAAACAGATCATGGT	GAGTATATGAAGAATAAACAGATCATGGA	CATCGCATTACGCTTTGAAATCACGAATT
WRC1136	BS00072755	chr5A	575702699	ATTTGGCCATGGCATCCTCAGGAGGTAGATGGACCATGGGCAATTGTGAA[R]TAATTGGGATTGCCTACGGGTGCGCGTGTGCCAAACAACACTTTTTGGAC	CACCCGTAGGCAATCCCAATTAT	CACCCGTAGGCAATCCCAATTAC	GTAGATGGACCATGGGCAATTGTGAA
WRC1137	BS00055102	chr5A	671551538	ACAGCAGCCCCCAACGCCTCATCAGCATCACCGTGTATAGCAACGAAACC[Y]CTGGAGGCTGCATCGTTGGCTTCTCCTTCACCTACGTGGACCAGACCGGA	CACCGTGTATAGCAACGAAACCC	ATCACCGTGTATAGCAACGAAACCT	GTAGGTGAAGGAGAAGCCAACGAT
WRC1138	BS00066675	chr5A	677130733	TTTGTATGCTGATAAGATTTTTGTACACGGTAAATGTTAGCTCTCTAATG[R]TTCTCGTTGGTAGTAGTTGTTTGTTTTATCCATTTGGATTGGTAGACCAC	ATAAAACAAACAACTACTACCAACGAGAAT	AAACAAACAACTACTACCAACGAGAAC	TTTGTACACGGTAAATGTTAGCTCTCTAAT
WRC1139	BS00028802	chr5A	680661748	GACACAGAATGACTAAGAGGTTGAGACTTTAGAATCATTATGATGCACAC[R]GCCATTTTTACGTTATAGTTTATGAAAGGCAACGAGGCCATGTCATTGGT	GAGACTTTAGAATCATTATGATGCACACA	GACTTTAGAATCATTATGATGCACACG	CCTCGTTGCCTTTCATAAACTATAACGTA
WRC1140	BS00022028	chr5A	702169159	TGAAGATGCAGCATTGGAAAGCAGAGTTGGGACCATGGAAAACACTCTGG[W]TGATGCAATTGGAGAGGAGCCTGAAGCCGTACCAGTGGAAAACAGAGGCA	GGGACCATGGAAAACACTCTGGA	GGGACCATGGAAAACACTCTGGT	CTTCAGGCTCCTCTCCAATTGCAT
WRC1141	BS00021684	chr5A	705571265	TCCATACTTGGTATGGTTACTTGTTCCGTCTGGTTTCACCCTTGGCCACC[M]TCGCCGCGTTCGTCATGTTCCAGTTAAGTGGTAATAAAAATGGTTACAAC	GAACATGACGAACGCGGCGAT	GAACATGACGAACGCGGCGAG	ACTTGTTCCGTCTGGTTTCACCCTT
WRC1142	BS00022336	chr5B	15553250	ACTGGCTAGAGGAGCATCACACTGACGACGAACTGAGGATATGAACGACT[Y]GAATGTACACGCAGCGGTATCGATGACCGACGTCGGTGTTCATGGTTTTC	ACGAACTGAGGATATGAACGACTC	GACGAACTGAGGATATGAACGACTT	TCATCGATACCGCTGCGTGTACATT
WRC1143	BS00065538	chr5B	17574934	AATGGTGCTCAATGTCTGCTTTGTTGGTAACCATGATGAAAACGAAGGCA[Y]TGTGGTTGCTCTGCAATACCCTTGTGAAGAGGAGTTTTGCACATATGGTT	GGGTATTGCAGAGCAACCACAG	AAGGGTATTGCAGAGCAACCACAA	GCTTTGTTGGTAACCATGATGAAAACGAA
WRC1144	BS00001101	chr5B	455738725	TTTACCGGGCCTCCTTGGGGGTTGTTGAGGAACATCAACATCCCTAGTAT[K]GTCAGGTGTGTTGCTTTCAGCGTCTGTTGTAGCTATAGGTGCAGGGTTGC	CGCTGAAAGCAACACACCTGACA	GCTGAAAGCAACACACCTGACC	TTGTTGAGGAACATCAACATCCCTAGTAT
WRC1145	BS00023163	chr5B	540266445	CTTTACGACCGTCTCCTTGATTAGGTTGTTTCCGAAGAATCTGGGTTCAG[Y]TGAGCTACCTATCTGAATATGGTGTAAATTCTTTGGTTGCTCCACTGAAA	CACCATATTCAGATAGGTAGCTCAG	ACACCATATTCAGATAGGTAGCTCAA	ATTAGGTTGTTTCCGAAGAATCTGGGTT
WRC1146	BS00022991	chr5B	638508552	TCACCACTATGAATCCGGTGGGGGTTGTCACAGCGTTTCTGTAATGGAGT[Y]CAACTTTGATGTCTACTTTTGTGCCAAGTCCCGAGCCAACAATGTTTGTA	CACAGCGTTTCTGTAATGGAGTC	GTCACAGCGTTTCTGTAATGGAGTT	GACTTGGCACAAAAGTAGACATCAAAGTT
WRC1147	BS00055493	chr5D	545932773	CTTCTGAAGACCTGAGCTCCCTGGACTGCTCACTGGCTGATCGAGCTGGA[K]AAGAAAGTAAGGGAATCCCCAACACTAAGCCGGTGAAGATGACAAGGACC	CACTGGCTGATCGAGCTGGAG	CACTGGCTGATCGAGCTGGAT	TTAGTGTTGGGGATTCCCTTACTTTCTT
WRC1148	BS00022850	chr5D	546651054	TTTCATCTGGACTGGGCTGAAAGCTCCATGTTTTTAGTTCGTGTTTATAT[S]TTACGAGAATGCTACTGCCTACATTGTATTGTAGATGTATGCCTTCTTTT	ATGTAGGCAGTAGCATTCTCGTAAG	ATGTAGGCAGTAGCATTCTCGTAAC	CTGAAAGCTCCATGTTTTTAGTTCGTGTT
WRC1149	BS00022291	chr5D	547527456	AGGCAACGAAAATCCCCAAATCGTTCGGTCGGTACAGATACTAAGTACCG[R]CAGTTCATAAGTGCAATTCTCTTGATGACTGGTAGATAAGTTGGGTGGAG	CATCAAGAGAATTGCACTTATGAACTGT	ATCAAGAGAATTGCACTTATGAACTGC	CGTTCGGTCGGTACAGATACTAAGTA
WRC1150	BS00058709	chr5D	557685578	ATTTCGTGCTCAGTTGAGCTAACTAACGAGACAAGTAATTCCACTGCCTT[Y]AACATCCTAACGCCAAGCGAACAGTACATCGCTCAGCCAGACAAAGGCAT	GAGACAAGTAATTCCACTGCCTTC	CGAGACAAGTAATTCCACTGCCTTT	ACTGTTCGCTTGGCGTTAGGATGTT
WRC1151	BS00023094	chr5D	558080991	GTATGTGTCAGTGTTAGTATGGGTCACGTACGGTGTGGGCTTAATGCATA[S]TGTACTTGGTGGTGGTGTGTGTGCATGGCTGTAGACATGTAGTACATGTA	CACACACCACCACCAAGTACAG	CACACACCACCACCAAGTACAC	ACGTACGGTGTGGGCTTAATGCATA
WRC1152	BS00022688	chr5D	548879280	ATGGTGCTATCAATGGAAACTAGTCGACGTCGCCTTTTTCTGTTTCCAGC[Y]ACGGTCGTGCCGTTCTTTGGTTTAGATGGCGATTCGTCCCAGATTATTTA	CCAAAGAACGGCACGACCGTG	ACCAAAGAACGGCACGACCGTA	ATGGAAACTAGTCGACGTCGCCTTT
WRC1153	BS00021991	chr5D	559845977	AAGAACAAGAGGCAGCAACAGACGCAGACAAGCAAACGGTACAGAACGAG[R]CAGCACAGCCACAGGTGATAATAGAGCAGGAGGGTGAAAAAGCCGACGAT	ATTATCACCTGTGGCTGTGCTGT	ATCACCTGTGGCTGTGCTGC	ACGCAGACAAGCAAACGGTACAGAA
WRC1154	BS00029317	chr5D	559849813	AAGTTGTTTTGGTGTTATATAAGAGATTGGTTCTGGTTGGTAACATTTTA[Y]AGTCAATTATGAGTTGGATTTTGGGTTGTTGATGATTGGTTCTGGTAGCA	CAACCCAAAATCCAACTCATAATTGACTA	ACCCAAAATCCAACTCATAATTGACTG	ATAAGAGATTGGTTCTGGTTGGTAACATTT
WRC1155	BS00074877	chr5D	440374096	CTATTTTAAATAACAAAGTAAGGAAATTCCCATCACAGTTCAAATGTTAT[S]AGGAGTCCTGATTGGTAGCGCGTCCAAATTGCAACCAATAAAGCTGGTAG	CGCTACCAATCAGGACTCCTG	CGCTACCAATCAGGACTCCTC	AGGAAATTCCCATCACAGTTCAAATGTTAT
WRC1156	BS00024761	chr5D	439787057	GGACGGCAGAAACCTGGTTCCCAAACATACTATTGTGAATACTCTGTGGA[Y]GTGGTAGCTTAAAAAATTGACATTCTATTGCGGGCCATGCATTTCAAGCA	AAACATACTATTGTGAATACTCTGTGGAT	ACATACTATTGTGAATACTCTGTGGAC	GCATGGCCCGCAATAGAATGTCAAT
WRC1157	BS00023192	chr6A	14460177	ATCCCTTCTTAAATTACTGGCGAAAAAATACTTCCAGATTGTAAGACTTT[M]TCATCGTAGAAATCTACAAGGCATTGGCATCACCTAAGCAGCATAATATA	CAATGCCTTGTAGATTTCTACGATGAT	AATGCCTTGTAGATTTCTACGATGAG	GCGAAAAAATACTTCCAGATTGTAAGACTT
WRC1158	BS00081386	chr6A	24331908	CCTGAGCACAGCTATATCGAACGCTAGTCTGCCTTTTTGCTCTGATGATC[R]GGATCTCCACCTTCTTCCTTCTCTTCAGCTTGCGCCTCGCTGAACTCCAG	AGAAGGAAGAAGGTGGAGATCCT	GAAGGAAGAAGGTGGAGATCCC	CGCTAGTCTGCCTTTTTGCTCTGAT
WRC1159	BS00066522	chr6A	74499322	AGAAGAGGAGCCTTGTCAGATTTGCTATTGAGTCTTTGAAACCAGAAGCC[Y]GACACCACAAGAAATGTGCTGCTGTTCGAATATTGAACTCAGTTCTTCAG	GCAGCACATTTCTTGTGGTGTCG	AGCAGCACATTTCTTGTGGTGTCA	AGATTTGCTATTGAGTCTTTGAAACCAGAA
WRC1160	BS00078715	chr6A	424093800	GCGGAATGTCGCTTGGGTTATCAGGGAGGCGAATATTATATGGCGACTGG[Y]GTTAGGTGGAGTTCAGATCTCACATGTTGTGCTGTTCGGGCCCGGCTGGG	GCGAATATTATATGGCGACTGGC	AGGCGAATATTATATGGCGACTGGT	CAACATGTGAGATCTGAACTCCACCTA
WRC1161	BS00061296	chr6A	554104391	CTGGGTGTTGCCCTTCTTTGGCACCGCGTAGTATGTTCCCGAGCTCAACC[W]CTGGTTTGGTGTCTCTGATCAGGACTACCACTTGCCTTGTGCGGCCGATC	AGTATGTTCCCGAGCTCAACCA	AGTATGTTCCCGAGCTCAACCT	GGTAGTCCTGATCAGAGACACCAAA
WRC1162	BS00022836	chr6A	534962109	CTGCGGCAACAATTCGACTGACGGGTGTCACCGGGAGTGCTGGTGCACTC[R]GTCTGTACACTAGGTAGAATCGAATCTCTTTGCTTGTTCCATTGCGTCGC	CGGGAGTGCTGGTGCACTCA	GGGAGTGCTGGTGCACTCG	AGCAAAGAGATTCGATTCTACCTAGTGTA
WRC1163	BS00063470	chr6A	566887692	TATCCTGATGCAAACGTCCGGGTGGAGATTCCATGAGCAGGCGAGCTCGT[Y]CACTCCTTTGAGTTTTCGCTGCAAAAACATCCTACATTAGTGAACAAAGG	GCAGCGAAAACTCAAAGGAGTGG	GCAGCGAAAACTCAAAGGAGTGA	TTCCATGAGCAGGCGAGCTCGT
WRC1164	BS00082104	chr6A	581842016	GCTTGCTAGGCTTACATACACTGTGATACGCAGTTGGTGATCTAGAAGTG[Y]ATAGAATCTTGTCGGCCTTTCGTGCAGTGTTGCTCATATACCTCTGGGAG	CGCAGTTGGTGATCTAGAAGTGC	ACGCAGTTGGTGATCTAGAAGTGT	GCACGAAAGGCCGACAAGATTCTAT
WRC1165	BS00023197	chr6A	613245695	CCACATGAAAATTAAGGTTGTAGCCACCAATAGCTATGCTCTGCATCATA[S]TAAATATATAAACAAGCTCTAAGCATTCCGTTGCACTTGCTATTTTTCAT	CCAATAGCTATGCTCTGCATCATAC	CCAATAGCTATGCTCTGCATCATAG	GCAACGGAATGCTTAGAGCTTGTTTATAT
WRC1166	BS00022579	chr6B	26625412	GCACGTATAAGGCCCTTATTTTTATGTCACCTAAGAATTTTACTGTTCAT[Y]ACGTATATATACAAACCGTATATCTACGTCTGCAGCCCCAGCGTAATAAG	TATGTCACCTAAGAATTTTACTGTTCATC	TTTATGTCACCTAAGAATTTTACTGTTCATT	CTGCAGACGTAGATATACGGTTTGTATAT
WRC1167	BS00076307	chr6B	46847541	AAACTTGAGGATAGTACGTGGGTTTCCAGCCTGGGAGGACGGTGATTGCT[R]CAGTTTGGAAGAGTTGGGCCCTCTTTCTCGTCTCAAGGATATTGGAATAT	GGGCCCAACTCTTCCAAACTGT	GGCCCAACTCTTCCAAACTGC	CAGCCTGGGAGGACGGTGATT
WRC1168	BS00110584	chr6B	46766179	ATCACCTAGAACCATCTCCCAGTCACTGCGCTTTTTCTCCTTTTGGCACA[R]GAGTCCCCCCATCACTTTGACAGCAAGAGGCAAACCATCACATTTTGTTA	GCGCTTTTTCTCCTTTTGGCACAA	CGCTTTTTCTCCTTTTGGCACAG	GGTTTGCCTCTTGCTGTCAAAGTGAT
WRC1169	BS00070120	chr6B	76002927	GTGTTTCTTTGGGCTATAACCAATGCGATGTCTCCATCTACTAGGTAGTT[R]TTTTCTTCCAATGGCTACATGTACTTATATAGTTTGTTAACTTCTTCTCG	ATAAGTACATGTAGCCATTGGAAGAAAAT	AAGTACATGTAGCCATTGGAAGAAAAC	GCGATGTCTCCATCTACTAGGTAGTT
WRC1170	BS00028997	chr6B	644431381	TTAATAGAACTTCCTAGAATTAAGAAAGCATCTAACACATGGCTAAATGA[R]AGATGGCAGTGGATGATCACTGAATTGTTCGCATTTATGCAGCCTACAGC	TCAGTGATCATCCACTGCCATCTT	CAGTGATCATCCACTGCCATCTC	GAATTAAGAAAGCATCTAACACATGGCTAA
WRC1171	BS00022709	chr6B	149058015	CAGTTCTAAAATTCATGAAATAACTGGACAAGTGAGACCAGCTTATTATT[S]ACCAGTCGGCAAATTCATCCACCGTACTGGAAGGGACATGTAATAATTGA	GTGGATGAATTTGCCGACTGGTG	GTGGATGAATTTGCCGACTGGTC	AACTGGACAAGTGAGACCAGCTTATTATT
WRC1172	BS00072775	chr6B	664383576	TTGTATTTGTACTAGTCATGCATGTGTTCATTTTGCACAAGTGTGCGCAC[R]CCCTACGGGTCTATTTATGGCGAAAAGGAACATGTTTCATGAAGGTGCAA	CGCCATAAATAGACCCGTAGGGT	GCCATAAATAGACCCGTAGGGC	CTAGTCATGCATGTGTTCATTTTGCACAA
WRC1173	BS00075795	chr6B	684014263	AGCCCTGCCCATGCCTCACGATCCGCAAATTAGTTGGCCCCGCACGAGGA[Y]ACAATAAGTTTTAAGTTTTAGTTTTTGAAACTTCCTATTTTGCAGACCGC	TGGCCCCGCACGAGGAC	GTTGGCCCCGCACGAGGAT	GCGGTCTGCAAAATAGGAAGTTTCAAAA
WRC1174	BS00022204	chr6D	465957610	CACTGCAAATCTGTTTCAATTGACCTAATGTTTTTAGACATGGTGAGGCC[K]TTTGAGGATGACTACCTGTGTCCTGCTTGGTTTGCACCTGGAGGGGTCAG	AATGTTTTTAGACATGGTGAGGCCG	AATGTTTTTAGACATGGTGAGGCCT	CAGGACACAGGTAGTCATCCTCAAA
WRC1175	BS00070856	chr6D	472789815	AGATCGAACGGACCACATTCATCCAAATAGTCATTGATGGGTTGCATTAT[K]TTATTCGGACGCAAGTTACCTTCTATTTTCTCACCACCAAGTAAAAATTC	ATAGAAGGTAACTTGCGTCCGAATAAA	AGAAGGTAACTTGCGTCCGAATAAC	CATCCAAATAGTCATTGATGGGTTGCATT
WRC1176	BS00107889	chr6D	455736255	TCCTCCTCCTTCCTTCCACCTTTTCCTCTTGAGAGTCGCCTCCTGTGCAG[K]CCCGGCTCGGGCCCCTCTCCTCTCCGACGGCGCTGCCGGCCGGAGTAGGG	GAGAGTCGCCTCCTGTGCAGT	GAGTCGCCTCCTGTGCAGG	GGAGAGGAGAGGGGCCCGA
WRC1177	BS00042153	chr6D	318563636	GATTTTCATTTCAAGGTTACTGCAAAGTGTCGCCTTGCTCTCACTGTTTA[M]TGCCTCTAGATGGACCATCAACGACAACGCAAGTCGTCTCTGAATATAAT	GTCGCCTTGCTCTCACTGTTTAA	GTCGCCTTGCTCTCACTGTTTAC	TGCGTTGTCGTTGATGGTCCATCTA
WRC1178	BS00022724	chr7A	2467264	CAACAATGAGCGATCTCACTCTATCTAGCCAACATACAAGACACCTCACT[R]GCACCACAGCTTACACGAACTAAAAGTAATAAACAGACCTAAAGCAGCAT	TTAGTTCGTGTAAGCTGTGGTGCT	AGTTCGTGTAAGCTGTGGTGCC	GATCTCACTCTATCTAGCCAACATACAA
WRC1179	BS00010887	chr7D	6003221	TCATTCAAATCCTTCCTGGCCATGTACTGCTCGTACAGAGGCGCAGCCGC[R]CGTTTCCTTTCCTCCTCAGCACGTTTGAACTCCTCACGTCGAATCCGGTC	GTGCTGAGGAGGAAAGGAAACGT	GCTGAGGAGGAAAGGAAACGC	CTTCCTGGCCATGTACTGCTCGTA
WRC1180	BS00074230	chr7A	82885272	GTATGGAGACTTCCCTCGTAGCGCCTCACAAAACCTGCCGCCTAGCAAGT[M]TGAGAATTGCCATATTGCCAAGTTCGTGAAATTGAGCAGTGTGACTGAAT	CAAAACCTGCCGCCTAGCAAGTA	AAAACCTGCCGCCTAGCAAGTC	CAATTTCACGAACTTGGCAATATGGCAAT
WRC1181	BS00039009	chr7A	83737440	TGATCTCTATGAAACTGCAAGGACATCAACAAGTGCTTTGTCGTACTATG[Y]GGTTGGTTTGTTGAATGGGAAATATACAGTTCAACTCTTCTTCGCAGAGA	ATATTTCCCATTCAACAAACCAACCG	GTATATTTCCCATTCAACAAACCAACCA	GACATCAACAAGTGCTTTGTCGTACTAT
WRC1182	BS00078174	chr7A	618108837	GGGCCCTAACTTCTGCAACATGACTCGTTGTTCCTCCAGCTCGAGCGCTC[W]CCACACCTCCTTGGTGTGCTTGCACTTGATGAACAGATGGGCGCCATCCT	AAGCACACCAAGGAGGTGTGGT	AAGCACACCAAGGAGGTGTGGA	CCCTAACTTCTGCAACATGACTCGTT
WRC1183	BS00022079	chr7A	642817874	ACTACTAGAGGCAAAGACAGACAGACGCGGCCGGAGCACTATGACGGCTT[Y]GATGGGCGTGGAGGAGTGCACGAAGACGCTGCGGAGCACTGCTGAGGAGC	CACTCCTCCACGCCCATCG	GCACTCCTCCACGCCCATCA	GCCGGAGCACTATGACGGCTT
WRC1184	BS00034085	chr7A	647234382	TGATACAACAGAGATGGAATTGTAACTAAGGAATCCCCTAGAATAAGCAA[M]TAAATGATTAACACTTCTGTAAGAACCCCTATAACAAAATATGAGCAGAC	GGGTTCTTACAGAAGTGTTAATCATTTAT	GGGTTCTTACAGAAGTGTTAATCATTTAG	GTAACTAAGGAATCCCCTAGAATAAGCAA
WRC1185	BS00023178	chr7A	707733374	GCACTTGCTCTTGGTTTCTGGCTGCTGTTCCATGGTTTCTTTGGCTGGAT[S]TCCATATCCCAAAACTGACTCTGGACTTGATGAGTATGAAGCCGGCTATG	TCCATGGTTTCTTTGGCTGGATC	CCATGGTTTCTTTGGCTGGATG	ATCAAGTCCAGAGTCAGTTTTGGGATAT
WRC1186	BS00071736	chr7A	733293730	ACAAGTCCTAACCAAGATGGATCAGGCCACCCAATCTCAATCAGATCTCC[K]CAAGGAGTTCGAGCAGCTGGTTACAGAGAAGAGGTACCTCGTTGTCTTGG	CCAGCTGCTCGAACTCCTTGC	ACCAGCTGCTCGAACTCCTTGA	TCAGGCCACCCAATCTCAATCAGAT
WRC1187	BS00023023	chr7B	683407618	GACTCTTCATGTAAAAATGCATGTACGATATGTGTAGTATCTGTGTTTGA[Y]TTCGGCAGCTGCAATCATTTTCTATTGGTCCAAGCTCCGAAACATTGCAT	AGAAAATGATTGCAGCTGCCGAAG	AATAGAAAATGATTGCAGCTGCCGAAA	GCATGTACGATATGTGTAGTATCTGTGTT
WRC1188	BS00074083	chr7B	62941530	CAAACCATTAGTATCTCAATGGACACATTGCACAAGTTCATATACTTCAG[R]CATACTATATATTTCGACCTCACTTGGAATTCTATAAAATCCATCCTAGT	CACATTGCACAAGTTCATATACTTCAGA	ACATTGCACAAGTTCATATACTTCAGG	GAATTCCAAGTGAGGTCGAAATATATAGTA
WRC1189	BS00064344	chr7B	45132934	AAGCAAATTCCATTCGAAGCAAGTGGTTGGACATGATATACTCATGAACA[Y]GTTTATGGTTAAAGCTTAACGGTCACTAAATTTCCGACGATTGATTTTTC	GACCGTTAAGCTTTAACCATAAACG	GTGACCGTTAAGCTTTAACCATAAACA	CAAGTGGTTGGACATGATATACTCATGAA
WRC1190	BS00077147	chr7D	629286613	CCCTCACACAGGACAGTGGGATCAGGAACTTATTAGGTCCGTCATTAAAC[Y]GGTAGATGTTGCTAGAATAATTCAAATTCCTCTCCGGATGGAGGCCATGA	AATTTGAATTATTCTAGCAACATCTACCG	GAATTTGAATTATTCTAGCAACATCTACCA	GATCAGGAACTTATTAGGTCCGTCATTAA
WRC1191	BS00109445	chr7D	625552294	TGAGATCTCTATGTATACATTGTCCTCGCCGTAGTTCATAGCTTCGACCA[R]CAGCTAGATAGTGGCATGTTATCTTCACCTAGCTGTTCATGTCCTGTTTT	AAGATAACATGCCACTATCTAGCTGT	AGATAACATGCCACTATCTAGCTGC	TTGTCCTCGCCGTAGTTCATAGCTT
WRC1192	BS00096478	chr7D	629476959	TCATCATCACCAAGAAGCTCCTTGAACTATACACCGGCTTCGAGGGTGTC[S]GCACCCTCGTCGATGTCGGCGGCGGCATCGGCACCACCATCCACGCCATC	CGACATCGACGAGGGTGCG	CGACATCGACGAGGGTGCC	AGCTCCTTGAACTATACACCGGCTT
WRC1193	BS00110642	chr7D	15307553	ATCAGACACTGTTACTAGGTGCATCAGATTCTTGCAACCTGAAAGCCCAC[Y]GCTGCTGAAAGATGATGAAATCTTGTATAAAAAGCATACAAGACACATGC	CAAGATTTCATCATCTTTCAGCAGCG	ACAAGATTTCATCATCTTTCAGCAGCA	GGTGCATCAGATTCTTGCAACCTGAA
WRC1194	BS00105996	chr7D	14421479	CTGCACTACCTAAATTATGGTAGCACTATCAAGGTAATTATGGCAGTAGA[W]GACGCGCAATTTCCAGATTGTCACAAGCTTTTAGAAGATTTTTCTGAGTC	GACAATCTGGAAATTGCGCGTCT	GACAATCTGGAAATTGCGCGTCA	GTAGCACTATCAAGGTAATTATGGCAGTA
WRC1195	BS00110124	chr7D	15307745	CATACAAGAGCATTTCAGAAGCTTGCAAATGGCTCTGTGCTACCATACCA[R]GCCATGGTTTATATTGCAACTAGGGGGGACACAAGGCCAGCGAGTAAAAA	CCCTAGTTGCAATATAAACCATGGCT	CCTAGTTGCAATATAAACCATGGCC	CTTGCAAATGGCTCTGTGCTACCAT
WRC1196	BS00065533	chr1B	462997902	CTTGTCATGCACTGCAGGTTTTACATGTTGACGAGCTGCCTTGCATATCA[R]TGAAGTTATTGAGCCAGTGCTTGCATACATATATATGGTTTAATCGTAAG	GCAAGCACTGGCTCAATAACTTCAT	CAAGCACTGGCTCAATAACTTCAC	CATGTTGACGAGCTGCCTTGCATAT
WRC1197	BS00023150	chr7D	555014794	TAGTATAAATTTCACCATCGGTGATTCCATCTTCCTTCCGTTTGTGTAGT[Y]GACCGGCCAGTGGACGAACACAAGGAACACGTACAAAGCACATACAAGAA	GTTCGTCCACTGGCCGGTCA	CGTCCACTGGCCGGTCG	CGGTGATTCCATCTTCCTTCCGTTT
WRC1198	BS00000020	chr5D	3031745	CTGGCTCAGCTGCTTGCAGCACTTCTCCCGAACCTCATGCTCACAGCCGC[Y]CTTCCACCATTTTGTGGGCCAGGTGACTGGAAAATCCTTCATTGTGAAAC	CCTCATGCTCACAGCCGCC	CCTCATGCTCACAGCCGCT	TTTCCAGTCACCTGGCCCACAAAAT
WRC1199	BS00005380	chr7A	129188638	GCACCGGCATTGCTTACGCGTCGCAACGAATTCACAATTGTTCTCATGAT[S]AGGCGGCATTTGCTGTTGAAGCAGTTTGGGTACCTCACTACATGTGTATC	TCAACAGCAAATGCCGCCTG	CTTCAACAGCAAATGCCGCCTC	CGCAACGAATTCACAATTGTTCTCATGAT
WRC1200	BS00007236	chr3B	17289873	GGTGAAGAAGTGCGCCAAGACCTGTAAGAAGTGCGAGAAGGACGAGTCGG[M]CGCTTCCCGCTTCGTGTGCCGCGACCGCTACTTCGGCTGGCCCGGGCCCA	GCACACGAAGCGGGAAGCGT	CACACGAAGCGGGAAGCGG	CCAAGACCTGTAAGAAGTGCGAGAA
WRC1201	BS00011038	chr4B	1562833	GCATACGAAAGCATTCGACCATCGGGTCCTGCTTACTATATGAGCCAAGC[Y]GACCTGACCCGACCCATGTAGCAGGGTGTTATGGAGAGTTGCAAAGCATC	CCTGCTTACTATATGAGCCAAGCT	CTGCTTACTATATGAGCCAAGCC	CAACTCTCCATAACACCCTGCTACAT
WRC1202	BS00011075	chr2D	88612054	CGCCTCTGTAGTCATCTGTTTGATTGTCTGGTTGCGCTGGTTGATTTTTT[Y]TGTTTTCTCTGACAGCTTGTCTGAAAGTCTTGCACAAGATTGTTTTTCTT	GGTTGCGCTGGTTGACTTCTTT	GGTTGCGCTGGTTGACTTCTTC	AATCTTGTGCAAGGCTTTCAGATACCTT
WRC1203	BS00012084	chr3A	688884175	CAGCTGCCCGTTGTCGTCATTGTGTTCAACAACAACGGTGTCTACGGTGG[S]GACAGAAGAGGCCCAGATGAGTTAACAGGCCCCTACAAAGATGACCCCGC	CATCTGGGCCTCTTCTGTCC	CATCTGGGCCTCTTCTGTCG	TCATTGTGTTCAACAACAACGGTGTCTA
WRC1204	BS00021717	chr7B	734718811	GCACGGTTTGTGTAGTATATTAAGGCGTTAAGGATATTTTTGGTAGTTAA[Y]AAATTAAATTCAGCTTTCCCCGGACACGCCGAGGTCATTGACGCAGGCAC	GGCGTTAAGGATATTTTTGGTAGTTAAC	AAGGCGTTAAGGATATTTTTGGTAGTTAAT	CGTGTCCGGGGAAAGCTGAATTTAA
WRC1205	BS00021744	chr7A	725854837	TCACGGTTCGATTCCTTCGGGAGCAGCGCCGAGCTTGGCAGCGGCAA[Y]GACGCATTCGGGAGGTTTGACTCTTTCAGCAGCAATGCTGATCAAGGCGGTGG	CAAACCTCCCGAATGCGTCG	GTCAAACCTCCCGAATGCGTCA	GCCGAGCTTGGCAGCGGCAA
WRC1206	BS00021965	chr6A	595563983	AGAACCTCAAGTGCAAGCACGCGTGATGGGCCGTGGCCTCTTCATCACGG[R]ACCCACCTTATTAGCTGCTTCCTACTACAATGCAAGTATATCGATCTCGT	AGGAAGCAGCTAATAAGGTGGGTT	GGAAGCAGCTAATAAGGTGGGTC	TGATGGGCCGTGGCCTCTTCAT
WRC1207	BS00022045	chr7B	626030392	CTATCACAAGTTCCACTCTCCGATGAACAGCTAATGGATACATGTGCCGT[Y]GAGCCACTTCAGAGAAGGGCTGAGGGTCGACACGACAGCTGCAAAGCTAT	AGCTAATGGATACATGTGCCGTC	ACAGCTAATGGATACATGTGCCGTT	CGACCCTCAGCCCTTCTCTGAA
WRC1208	BS00022070	chr1A	13841775	AGAGGGCTGGTCAGGACGCCGGACAGCAAATCTAAGATCGATGGGGGCGA[Y]GACGTGTTCATCGGAGACATTAGGGATCCTGGGAGCATTGCGCCGGCGAT	AATGTCTCCGATGAACACGTCG	CTAATGTCTCCGATGAACACGTCA	GCCGGACAGCAAATCTAAGATCGAT
WRC1209	BS00022092	chr3A	737801482	AGCAACAAAGAGAATTTTCTATTTTGCATAACTAAAGAACCATACAAGAT[S]AGAGCAGAAGGACTACACAACCACACCAAAGCATAGAGGAATGACCAAAG	TTTGCATAACTAAAGAACCATACAAGATC	TTGCATAACTAAAGAACCATACAAGATG	GCTTTGGTGTGGTTGTGTAGTCCTT
WRC1210	BS00022122	chr3B	545963632	CTCAGGTTCTGGTTACTCTAAGCGCTTGTAGCCCCAGCTGCCCAACATTA[Y]GTGCATTTGTCAAGCAGACAAGCTAGCTGGAGTTTACACGTCTGGGCGCT	TGTCTGCTTGACAAATGCACG	AGCTTGTCTGCTTGACAAATGCACA	GTAGCCCCAGCTGCCCAACATT
WRC1211	BS00022163	chr6B	185673729	GTGTTTGTGTACCGCAGAAAAAAGGAAGAAGAAAAGGAGAGGAAGCCCGA[R]CCAAACCGAGCACCACTGTTTCCATACTTGATGGGAATGCCGATTTTGTT	AAGAAAAGGAGAGGAAGCCCGAA	AGAAAAGGAGAGGAAGCCCGAG	GTATGGAAACAGTGGTGCTCGGTTT
WRC1212	BS00022182	chr3A	724319878	AGCTGCTGTCCGGCCTTGCAAACCAAGCCAAATAAACGCCGCTGGACAGA[Y]CGCACTTGCTCAAGCGGGTTCAAGCTGCTCTGCCTGCTTTGTCCGGTGGG	CAAATAAACGCCGCTGGACAGAC	CAAATAAACGCCGCTGGACAGAT	GCAGCTTGAACCCGCTTGAGCAA
WRC1213	BS00022183	chr4B	1562469	GCAGCAGAGGACCGTTCTCCATCCAGTGTCGTGACAGATGAGAGCGGTTC[M]GTCGGTGGCAACCCAGAGTCGGCAGAGGGCGTAGGCCTACGACAAGGCAC	CGTGACAGATGAGAGCGGTTCA	GTGACAGATGAGAGCGGTTCC	GCCCTCTGCCGACTCTGGGTT
WRC1214	BS00022188	chr1D	462203530	GATTCGGCTCCGGGGGAAACCCTAGATCCTTTGTGATCGGACGTTGGTGT[Y]GTTTCCCCTCTCGACGGCTTCTCCGTGGAGTTGGGCATTAGCAGGAGGGA	TTGTGATCGGACGTTGGTGTC	CTTTGTGATCGGACGTTGGTGTT	GAGAAGCCGTCGAGAGGGGAAA
WRC1215	BS00022190	chr3B	12897084	GGAAATCGAGAGGTCATCATTGTCTAATGGGTTGACAACGCAAGACTTCT[R]TGTTGTGCCCAAGGTTTCAGGCGGACAAACTGATGTCATGCTCCGGATCA	ATGGGTTGACAACGCAAGACTTCTA	GGGTTGACAACGCAAGACTTCTG	CCGCCTGAAACCTTGGGCACAA
WRC1216	BS00022195	chr7B	717953310	GACAAGGACGTGCCTAGGATCATCTCAAAAAATATTGAGCATGCGTTGAC[S]AACGCCTTTGCGCCACTCGGCATCGATGACTGGAACTCCATCTTCTGGGT	CGAGTGGCGCAAAGGCGTTG	CGAGTGGCGCAAAGGCGTTC	AGGACGTGCCTAGGATCATCTCAAA
WRC1217	BS00022205	chr5A	665776004	GATTTAGTTATTCAAGCATAGGTACAACTAAGCAGGGTACACCCTCCCGT[Y]CCCGTATGTGGTATAGAAAGAATTTACACAGAGACCTCATGTACTACATA	CAGGGTACACCCTCCCGTC	GCAGGGTACACCCTCCCGTT	GTCTCTGTGTAAATTCTTTCTATACCACAT
WRC1218	BS00022212	chr3D	278974804	AGACGGTTGCTCCCTCCCCTAGACGCAGCCCCCAGATCAGCCGTGCTTAC[R]ATGGGGTGGATGTTGGCTCCATCGAGCGTGCAACCAAGAGGAAGGCCGTG	CCCAGATCAGCCGTGCTTACA	CCCAGATCAGCCGTGCTTACG	GATGGAGCCAACATCCACCCCAT
WRC1219	BS00022213	chr4A	599844631	CCGTTCAGGGACGGCGAGACGCTGCGGGAGGATGGCACCCGCCTTGACATSGACGCCGAGCTGAGGCTCGCCAGGGAACTCAGGAAGCAGATGGAGGCCGA	AGCCTCAGCTCGGCGTCG	AGCCTCAGCTCGGCGTCC	AGGATGGCACCCGCCTTGACAT
WRC1220	BS00022226	chr6B	176403432	CACGTTTCCCTGCCTCCCTCTTCCGTTGGTACTTCTTCACCTCCTTTAAC[R]CAACAACCAAGAAGTGCCCATCCCATGCAAACTCATCAATCTTGTCCATG	TGGTACTTCTTCACCTCCTTTAACA	GGTACTTCTTCACCTCCTTTAACG	ATGGGATGGGCACTTCTTGGTTGTT
WRC1221	BS00022240	chr6B	716342113	ATCTTCTGGAGGCTCTTGACTCACATCACGCCATCAACGATTGGCATGCAYAAGGCCGTGAAGAGGACTGTCAATGTTGCTTCTGTTGGTGCCCATGTCTG	GCCATCAACGATTGGCATGCAC	CGCCATCAACGATTGGCATGCAT	ATTGACAGTCCTCTTCACGGCCTT
WRC1222	BS00022285	chr1A	12450659	TGGGCTATCACGATTTGTTGATAAGATGATGAACAGCGGCTCAACGGAGG[W]TCCAAATGCTGGAAGATCTTCTGGAATTAGAGGATCCATCGGATATATTG	CCAGAAGATCTTCCAGCATTTGGAT	CCAGAAGATCTTCCAGCATTTGGAA	TTGATAAGATGATGAACAGCGGCTCAA
WRC1223	BS00022406	chr7A	17382937	AACAAAAGACTACTGCTCTGACATTGGCAGCGAACAAGGAAGTTAAACAC[R]ATGACCAATTGCATCATAACAATGCACCTTAATTGATAGTGGTATATTTT	GCAGCGAACAAGGAAGTTAAACACA	CAGCGAACAAGGAAGTTAAACACG	AGGTGCATTGTTATGATGCAATTGGTCAT
WRC1224	BS00022435	chr7A	127502210	AGCTCCTGATGGTAAAGGGTACCTGCTAATTCATGAATTGAGTGAGCTGG[R]CGATGTATTTGAGATTGAATTTATGTACGAATTTTCAATTTTGAGCTTAC	CGTACATAAATTCAATCTCAAATACATCGT	GTACATAAATTCAATCTCAAATACATCGC	GGTAAAGGGTACCTGCTAATTCATGAATT
WRC1225	BS00022478	chr2B	783226928	GGAAATAGTTCGGGCAGGGGCGGCAGCATAGGTAAGCCCGATATAAAGAA[R]AAGAAAACAAGCTACGGAGCCGGCCGGAGCAGGAAACAGGTGAGCCACCC	AGCATAGGTAAGCCCGATATAAAGAAA	GCATAGGTAAGCCCGATATAAAGAAG	GGCCGGCTCCGTAGCTTGTTTT
WRC1226	BS00022485	chr1D	492893167	ATTGCTTCAAACTGCTGCAGAAGGTGCTCCATATCCTTGGAGTGAGCACC[R]ATGCACTTCTCAATCGCAAGGGCATTCTCAGCACTGGAGACTTTTATGGA	CCATATCCTTGGAGTGAGCACCA	CATATCCTTGGAGTGAGCACCG	ATGCCCTTGCGATTGAGAAGTGCAT
WRC1227	BS00022494	chr2A	603376642	CCGATTTACTTGTCTTGAATTTATTTAGATAA[R]TAATTCGGAAAGGAGGGAGTAGGAGGTATGATGGCTGGGCAGTGGGCACTAGTAGAAGATTGAGCACA	CCGATTTACTTGTCTTGAATTTATTTAGATAAA	CGATTTACTTGTCTTGAATTTATTTAGATAAG	CTCCTACTCCCTCCTTTCCGAATTA
WRC1228	BS00022501	chr3D	575541011	GCAAGACTTGAAGATTATTCATCCAAAAGAGCATGTCGGATATGACCACC[W]TCAGAAGCAGCAATGCCACAAGTGAGGTATCTTACAATAAATCTATATGT	GAGCATGTCGGATATGACCACCA	GAGCATGTCGGATATGACCACCT	TACCTCACTTGTGGCATTGCTGCTT
WRC1229	BS00022652	chr5B	378851432	TAAAGGTGATCCAGGTAAGCCTGGCAAACCTGCTGCATGGGTTCACATGG[R]GACTCCCTGACGGTGTAGAGCTGAGCATGGAGGAGATCTTCGGCTTGTCC	GCTGCATGGGTTCACATGGA	GCTGCATGGGTTCACATGGG	AAGATCTCCTCCATGCTCAGCTCTA
WRC1230	BS00022795	chr6D	5177301	ACTCTTGAAGGTGGTAACAAAACCACGTAACTCTTGTTCAGCATACCGCCCGACGC[K]AGGCTCGACGCCGTCACGTAACAGACTCTCTAGAGACGTTATCA	GTGACGGCGTCGAGCCTC	CGTGACGGCGTCGAGCCTA	ACAAAACCACGTAACTCTTGTTCAGCATA
WRC1231	BS00022900	chr2D	27651324	CTGCCAGAGTGAACCCTTCTCCAAAAAACCCTTCTCCTAAAACTTCAGGC[R]TCATGTGCGACAGAAATAAAACGAGCTAGAAAAGGCCCTGGTTCTAGTGC	AACCCTTCTCCTAAAACTTCAGGCA	CCCTTCTCCTAAAACTTCAGGCG	TTCTAGCTCGTTTTATTTCTGTCGCACAT
WRC1232	BS00022934	chr1A	15233997	GGTTCACGCACTTTGTTATCGAAGGTCGATTCTCGTATGTTTGTGTCTCC[K]GTGTGTTAACTGGTCTACTCTCGCTGTGAGACTGGGTTCGCTTTATATCT	GATTCTCGTATGTTTGTGTCTCCG	CGATTCTCGTATGTTTGTGTCTCCT	CTCACAGCGAGAGTAGACCAGTTAA
WRC1233	BS00022951	chr6A	18704912	CTTTGGCGAGAATATCTACTAGAGTTAAGCATGTAAGGTTACACAGTTTT[R]CAACATCTGTGTAAGGTTTACTTTAGAATGAACATCTATGAAATGTTGGT	ATTCTAAAGTAAACCTTACACAGATGTTGT	CTAAAGTAAACCTTACACAGATGTTGC	CTAGAGTTAAGCATGTAAGGTTACACAGTT
WRC1234	BS00022959	chr7A	544188324	GCTGCAATTCGAGAAGCCCGATGCTTACTCCCAGCTCCTAGAACTACTGT[Y]TCGGGTCACCATGCCTGGTTTCTGGGGCAAGCGCCAGCAGAAATACGCTT	CCAGGCATGGTGACCCGAG	AAACCAGGCATGGTGACCCGAA	TGCTTACTCCCAGCTCCTAGAACTA
WRC1235	BS00022996	chr4A	737584997	GGACTGGCCTGGGGACGGCACGGAGGCTTTCGTGAACTTCTGGTTGTTCG[S]CGACAGCCAGCGCGGCGGCGGCCCCATCGTGACACACGAGGAAGACGCCG	GCCGCGCTGGCTGTCGG	GCCGCGCTGGCTGTCGC	GAGGCTTTCGTGAACTTCTGGTTGTT
WRC1236	BS00023014	chr4D	NA	CAGACTCGCTCCACGCCTCAATCTGAGAAGAAGCCCACCAATGTCCATGA[R]CGCTGATGAATATTAAGTGTTGCAAATAGGCGTTCTTCTGATTTTTCACT	AAGAAGCCCACCAATGTCCATGAA	GAAGCCCACCAATGTCCATGAG	CAGAAGAACGCCTATTTGCAACACTTAAT
WRC1237	BS00023024	chr4B	657986692	AGCGCTACCTCCATCCATTCTAGGAGTACAAGAAAAGAGAGGAGATCCCA[Y]CTGTATCCGCGGTCGGTCTCTGATGCGGTAGCACAAGTAGTAAATTCAGT	ACAAGAAAAGAGAGGAGATCCCAC	GTACAAGAAAAGAGAGGAGATCCCAT	CATCAGAGACCGACCGCGGATA
WRC1238	BS00023026	chr3A	557415074	TTTCCCCTCCGGCGATCTCGTCTCCACCCACTGCCTGTCAAGAGTTGGAG[K]GCCTCAAGCTCACTTGCACTTCAGCTCTCTCTACATTGTCTCGCTGGTGC	AAGTGCAAGTGAGCTTGAGGCC	GAAGTGCAAGTGAGCTTGAGGCA	CCACCCACTGCCTGTCAAGAGTT
WRC1239	BS00023035	chr4B	636917337	GCTCCTCCAGTTGATGGACAATATCCTTTATGAGGGGCCTTTTATATCGG[K]CTTTCTCCACACATTCTACTGCTATTTCAATACATTTCTTCACTTGTAGG	AGCAGTAGAATGTGTGGAGAAAGC	AATAGCAGTAGAATGTGTGGAGAAAGA	GACAATATCCTTTATGAGGGGCCTTTTAT
WRC1240	BS00023066	chr6B	710149921	CTACCAAAGCTTGCACTGCTGACTTTTAAAGGTTGGTTCTCACAGGAGGA[W]CCGTTTTGCGTTGGTCATGCCCCACTGCTCCAGAGTGTGAGCATCACTAA	AAAGGTTGGTTCTCACAGGAGGAA	AAAGGTTGGTTCTCACAGGAGGAT	CAGTGGGGCATGACCAACGCAA
WRC1241	BS00023068	chr2B	2531381	TACTTGCTTTGCACTGGCATTCTTAGTAGTAGTTCCCCGAACGTTGACTG[Y]AAATATGCGAGGATTTCCAACTTGCTGGTTGCATCACCAGGACAGTAGTT	AGTTCCCCGAACGTTGACTGC	GTAGTTCCCCGAACGTTGACTGT	CCAGCAAGTTGGAAATCCTCGCATA
WRC1242	BS00023088	chr6A	603136635	CATCACGATACATTTTAAAAAACATCGATGAAACATCGCGCAGCACTCTG[W]GCCAAGACAAGCTTTCGACAAAACAAGAAAACGTAGCACGGATCTCCAAG	GAAACATCGCGCAGCACTCTGA	GAAACATCGCGCAGCACTCTGT	GCTACGTTTTCTTGTTTTGTCGAAAGCTT
WRC1243	BS00023118	chr1A	3843936	TTGTCTTTCTCCAAGTAGTTAGAGACCGCACTGAGTTGAACTCGAGATTT[Y]TACTCTGAGGCATACGGCATTCATCAACTGTTCGACTGGAATAAGAATGT	GAATGCCGTATGCCTCAGAGTAG	ATGAATGCCGTATGCCTCAGAGTAA	CCGCACTGAGTTGAACTCGAGATTT
WRC1244	BS00023174	chr7B	568470774	GCTGTCGTGGTCGCGAGCAGCACTCGAGCAGCGATGGACGCCGGAGAAGT[S]CACACGTGCTGACCACTTTTACCAACTGTCGGTTACCAAGAGCGACCCAG	CGATGGACGCCGGAGAAGTC	CGATGGACGCCGGAGAAGTG	GCTCTTGGTAACCGACAGTTGGTAA
WRC1245	BS00023224	chr6B	686801143	ACTATTTCCAAGACGAGATCGACAATGCCGTGGATTCATGCTTGGCTCTA[S]TCCATAGTGATGATCTACTAGAAGCAACGCTTTCACTCAGGCTGGCGAGA	CGTGGATTCATGCTTGGCTCTAC	CGTGGATTCATGCTTGGCTCTAG	AAGCGTTGCTTCTAGTAGATCATCACTAT
WRC1246	BS00024921	chr2A	733091224	AAATCTTTTATTTAACAGCCACAGCTGAAATAGGTTCACAACAAGCGCAC[R]CAAAATTAGCAGCACACAGTTCAAAGAAGTAATGCGAAAAAGTAGCTTGA	GAAATAGGTTCACAACAAGCGCACA	AAATAGGTTCACAACAAGCGCACG	CATTACTTCTTTGAACTGTGTGCTGCTAA
WRC1247	BS00029915	chr5B	558346572	TCCTTTCCACCCCTCGCGAGATCTGCAACCCCTCCTGCTTCTCCGGCAGC[Y]TGCTCCACCTTGCTGCCAAAGAGGCGGTTCTTGGCTCATCTCTGCTGCTC	TTGGCAGCAAGGTGGAGCAG	CTTTGGCAGCAAGGTGGAGCAA	GAGATCTGCAACCCCTCCTGCTT
WRC1248	BS00030790	chr5B	580840091	GTTGTGAAGTGAGCGGTGTACATCCGCTCTCGATTCCGCAACTAGTCCCG[Y]CTCATGTAAAAGGTTCAGCCGTCAATACTGTACTTTTTGCAGTGGGTACA	CGATTCCGCAACTAGTCCCGC	CGATTCCGCAACTAGTCCCGT	TACAGTATTGACGGCTGAACCTTTTACAT
WRC1249	BS00031178	chr6A	51409130	AGAAAGTGGTATTCTTTCCAATAGTTTCTAGAAAATATGTTGTCTCCTTT[Y]CATTCATTTGTCATGTCCAGCATTAAAAAGTTAGTTCCTTCAACCTCACT	AGTTTCTAGAAAATATGTTGTCTCCTTTC	AATAGTTTCTAGAAAATATGTTGTCTCCTTTT	GAACTAACTTTTTAATGCTGGACATGACAA
WRC1250	BS00033209	chr3B	7796824	TGAGCCATGCATTGGGCATATTAGTGGGGGCATCAATGGAGTTGTCTTCA[K]GTCATATACACAACACATTCCTTGGCATCGAGTCTACCATTACCACCCTC	GGCATCAATGGAGTTGTCTTCAG	GGGCATCAATGGAGTTGTCTTCAT	CTCGATGCCAAGGAATGTGTTGTGTA
WRC1251	BS00035268	chr1B	651990177	CTGAACTTATTGTGGTGGTCACTACTACTCTACTAGCGCTATGAAAGCTG[Y]TAGCATCCAGCTACTGTGGGTTGTTATGCCTATGAACGATCTTAAAACTG	CTACTAGCGCTATGAAAGCTGC	ACTCTACTAGCGCTATGAAAGCTGT	AACAACCCACAGTAGCTGGATGCTA
WRC1252	BS00036667	chr5D	NA	CTGGACTAATAATAAACTTGTTGTTCCTACACATATGGTTTCCTGATTTG[W]ACCAAGCTTATTTTAAATTTCGAGGGTATGTGCATGTGTCGTACGGATGT	CCTACACATATGGTTTCCTGATTTGA	CCTACACATATGGTTTCCTGATTTGT	GACACATGCACATACCCTCGAAATTTAAA
WRC1253	BS00037276	chr3D	588322555	GGTGTGTGCCATCTGCTGTGATGGCCGGATGAAGGAGCTAGTTGAGATGT[S]GGGATGTTAGTTGCTTGAATAATCTTGTATGCCAAACATTCTTCTTCGCT	AAGATTATTCAAGCAACTAACATCCCG	AAGATTATTCAAGCAACTAACATCCCC	CCGGATGAAGGAGCTAGTTGAGAT
WRC1254	BS00039925	chr3A	528877071	CGACTGCGGTCTGAAACTCTGAATGCGTTGGATTTGTGGAATTGATTTTC[K]AGCATGATGTTCCACTTTTGATTCAGATGAATACAGATAAATTATGCTTC	GAATCAAAAGTGGAACATCATGCTC	CTGAATCAAAAGTGGAACATCATGCTA	CTGAATGCGTTGGATTTGTGGAATTGATT
WRC1255	BS00040283	chr7B	709217700	CGAAGACGGAGGAGCACATCCTCGAGCTTGTGGTGCTGCTCCATCATCTC[R]TGGTCCAGGTGAAGAGCCGAGGCTATGTGCAAAACATGCCTACAAAGCAG	GTGGTGCTGCTCCATCATCTCA	GGTGCTGCTCCATCATCTCG	TGTTTTGCACATAGCCTCGGCTCTT
WRC1256	BS00047753	chr1A	534160857	ATGCTTACATTTGATGATTAACTGATGTACTCTACATAGATCAATGTTGT[R]TAGCATGATGATAACAGCGCCTTCCAGGTGTAGGTGATTGCTCCGTGTTC	GATGTACTCTACATAGATCAATGTTGTA	GATGTACTCTACATAGATCAATGTTGTG	GGAAGGCGCTGTTATCATCATGCTA
WRC1257	BS00049213	chr5B	589581937	CGATGACATTAAACAATGGAAACAATGAGAAACAAACTGATAGCACACAC[R]CATATCAGTAAGCAATAAGCCCCAAATGTACAATCTTTCGAGCAAGACAG	ATGAGAAACAAACTGATAGCACACACA	GAGAAACAAACTGATAGCACACACG	GTACATTTGGGGCTTATTGCTTACTGATA
WRC1258	BS00049372	chr7B	706772541	ATGGAGTTTGCTGTAGCGGCATTTAGCACGGTAGCTGGCGTCGCCTTGTC[R]AAGCTCTGCAGCGTGAAGGGGAAGCTAAATACTGATGCTACCATCATCAG	GTAGCTGGCGTCGCCTTGTCA	AGCTGGCGTCGCCTTGTCG	TCCCCTTCACGCTGCAGAGCTT
WRC1259	BS00049977	chr3A	688688770	ATCGATCAACGACCTTTTAATGGCTGTTTTGATGCAAAGGAATTTCCTGG[Y]GTAGTACATTAGGATGCTTTGATTCATAGAATTGGAATCATCATGAGAAG	GAATCAAAGCATCCTAATGTACTACG	ATGAATCAAAGCATCCTAATGTACTACA	CGACCTTTTAATGGCTGTTTTGATGCAAA
WRC1260	BS00050328	chr7B	731376011	CCGGCTGCAAGATTTTAACAGTGGGTGGGGTCAGTTCTCTCATCACATCT[R]TCAGCCTAAAGAGGTTGTGGGCCAATGGTGGTGGGGATCCTCCCAACTCT	GCCCACAACCTCTTTAGGCTGAT	CCCACAACCTCTTTAGGCTGAC	GATTTTAACAGTGGGTGGGGTCAGTT
WRC1261	BS00057851	chr5B	629930641	CTTCATCAAGTGGCGAGCCTTCTACGAGCTTTGGCCAATATCGTTGAGGA[Y]TTCCAAGTTATGACACATGGTGGTACAGTGACTCACTCGTGCGACAAGTC	TTGGCCAATATCGTTGAGGAC	AGCTTTGGCCAATATCGTTGAGGAT	GAGTCACTGTACCACCATGTGTCAT
WRC1262	BS00062676	chr3B	4203951	GGCTCGGCGATGGCTACACACGTTGTGAAGCTTGCACGCGTGGAAGATCT[R]ACCAGTGCTATCGCATCTGTAACAGTGACTGCAACAACAACTGCAAGAAG	TGCACGCGTGGAAGATCTA	CTTGCACGCGTGGAAGATCTG	GTTGCAGTCACTGTTACAGATGCGAT
WRC1263	BS00062860	chr7D	11413031	TGGCTGCTCAACTGATCTGGCCGGCGATGTGATGTTGCTCTGCTCTGCTC[R]ACTGACCTGGCCGGCGATGTGATGTGAGTCTGTGACAAGTGAAGATGGTG	GTGATGTTGCTCTGCTCTGCTCA	GATGTTGCTCTGCTCTGCTCG	TTCACTTGTCACAGACTCACATCACAT
WRC1264	BS00063011	chr4B	5824668	ATCTCTTGTGAGTTGCGTACGATCATAAGAATGTTGTTGTGGCAATGCAC[R]TAGAGCGATCCTCGCCAATACTTAGCTGATTTCCATATAATCGTGTAGTC	ATAAGAATGTTGTTGTGGCAATGCACA	AAGAATGTTGTTGTGGCAATGCACG	CTAAGTATTGGCGAGGATCGCTCTA
WRC1265	BS00063425	chr5A	419868519	GAAGTTGTATAATTCCTTGGGCGTACTCCCATCCGACTGATAGGTAGATA[Y]GGTTGCCTCTTCAGTCACACTCTCATAGTATTGTCAGGATTATATCCACG	AGTGTGACTGAAGAGGCAACCG	GAGTGTGACTGAAGAGGCAACCA	CTCCCATCCGACTGATAGGTAGATA
WRC1266	BS00064453	chr6A	12153294	TCACTGTCCCCCATGGCACTAGCGAGGACCTTGGCGAGGACAGCTTTCGG[K]ATCTGGAAACATTATCGGCGTCCAAGCTCCTCTATGCACTATACATCTGG	GACGCCGATAATGTTTCCAGATC	GGACGCCGATAATGTTTCCAGATA	GGACCTTGGCGAGGACAGCTTT
WRC1267	BS00064536	chr1A	16185245	CAGTCCACAGCTATTGGAACCGCTGTATGAAAAATTGGCTGATTAATTAG[Y]TAACTACCACCCGACCGAGCAGTTACCAATTAACGATTTCCTGAACAATG	CGGTCGGGTGGTAGTTAG	GCTCGGTCGGGTGGTAGTTAA	GAACCGCTGTATGAAAAATTGGCTGATTA
WRC1268	BS00064579	chr1B	281706827	TAGGCAGACTTTTTGACTATAGATGGTCTCTAATTGATAGTTACGCCATT[Y]GTGAACTTCTCATGCTTTAGTGTTGTGATATACCAAAACATTGGCTATTG	CAACACTAAAGCATGAGAAGTTCACG	ACAACACTAAAGCATGAGAAGTTCACA	GATGGTCTCTAATTGATAGTTACGCCATT
WRC1269	BS00065456	chr2D	123100790	TCCTATCTGACAACCTTTCAACCTCAGCCCTTTTAGCTATTGTTCTTTTG[Y]AACGTGTAGATAACACCGCCCATATTCTTAAACACTTTAGTTTAATATTT	GGGCGGTGTTATCTACACGTTG	ATGGGCGGTGTTATCTACACGTTA	ACCTCAGCCCTTTTAGCTATTGTTCTTTT
WRC1270	BS00067161	chr6B	683212956	CGAGTCTGCGTTTTCGTTGCCGCTCTGTCGCAGCTAGGTTTGACCGTCAG[Y]GTCTCTTGGAGTCTGATCCTCGCAGTTTCACCGCGCTTGGGTCAGATGCG	CAGCTAGGTTTGACCGTCAGC	GCAGCTAGGTTTGACCGTCAGT	TGAAACTGCGAGGATCAGACTCCAA
WRC1271	BS00067242	chr3B	10202098	ATGGGCGAAGCGGGTTGACGGCGGCGTACCCATGGTTGGGGACATTGCCT[S]CAAGTCTGTGAGCTACCACATGAGGTGCAAGAATGGAAAGGGTCATGACA	CATGTGGTAGCTCACAGACTTGG	CATGTGGTAGCTCACAGACTTGC	GCGTACCCATGGTTGGGGACAT
WRC1272	BS00067768	chr1D	368340102	TCTGTTCGTTATAAAAGTTATCTTTCCCCTCTTTGGACGTACACCTTCGT[M]TAGTCCATTGGTCTCGACTGCTGTGACATGTGTTAACCATGAACTGCATG	AGCAGTCGAGACCAATGGACTAT	GCAGTCGAGACCAATGGACTAG	TTTCCCCTCTTTGGACGTACACCTT
WRC1273	BS00069105	chr3A	13837552	CAAGCTCTGCCCCATCACTTGCGCGAGAGGAAGCCACGGCGGCGCGCCGC[Y]GGCTGCCACGCTGTTGACTCCGGCGGTGGCTGCGGCACTCGCGATGGCAT	GTCAACAGCGTGGCAGCCG	GAGTCAACAGCGTGGCAGCCA	CCCATCACTTGCGCGAGAGGAA
WRC1274	BS00070260	chr5A	465294875	CTTCTGTGCCCGGTCATGACGCCACGCCTGCAAATTCGCCAGGCGCCCAC[R]AGCACCGTGTCGGCCCTGGTCCACTGCTTCTGCATCTGGTCCGCCACGCC	CAGGGCCGACACGGTGCTT	AGGGCCGACACGGTGCTC	GTCATGACGCCACGCCTGCAAA
WRC1275	BS00070580	chr1A	543765027	ATACAGCGATATCATGAGATCACATACCAATTGCAGGGCCAGAGCAAGTC[R]CCAGGACCGGATCTGCACCGATGGGGTATAAAACCCAGGATCAAGGGCAT	ATTGCAGGGCCAGAGCAAGTCA	GCAGGGCCAGAGCAAGTCG	GGTTTTATACCCCATCGGTGCAGAT
WRC1276	BS00070900	chr2B	24163307	CATTGTCGGAACATGAGTTATCTCACTAGGATGCGTTGTTTGCCAACTCT[R]TAACTTATGGTGGTGGTGGATGGCCCAAGGGATGTGGCGCTCAACTCCAT	AGGATGCGTTGTTTGCCAACTCTA	GGATGCGTTGTTTGCCAACTCTG	GCCATCCACCACCACCATAAGTTA
WRC1277	BS00070903	chr5A	413846602	TGAAAGTGGACTTGCAGAACTCAGTGACCTCCACTACGATCTCGTGCGGG[R]TAGCCAAATCAACATGCACTCGCTTCACTGTATCAGCACGACACAGGGGC	AGCGAGTGCATGTTGATTTGGCTAT	CGAGTGCATGTTGATTTGGCTAC	AGAACTCAGTGACCTCCACTACGAT
WRC1278	BS00070995	chr4A	725648816	TTGCTAGTAATCTGAAAGTAAGATATACTATATCCTAAAATATCATAGGC[R]AGGAAGTCACAGGCATGATTGGTTAGCGAGTTGCCGATGCACAGTGGAGA	AAGATATACTATATCCTAAAATATCATAGGCA	GATATACTATATCCTAAAATATCATAGGCG	CGCTAACCAATCATGCCTGTGACTT
WRC1279	BS00072221	chr4B	642923040	TTGCTCAAATTCAACAACGCAGCTGCTGCTAACCCCCAACTGTATGCCCG[W]GACAACTATCATCTGGTTCTGGGGTGATAAATTCTCTTAGTTCAGAAGTG	AACCCCCAACTGTATGCCCGA	AACCCCCAACTGTATGCCCGT	ATTTATCACCCCAGAACCAGATGATAGTT
WRC1280	BS00073173	chr5A	46234856	TACTTTGCATGTTAGATGATGTGTTGAGACATGCTGAAGTCTGTGTCGAA[R]AAAGCATCTCAAAAATGTTGAAAAAGCAATACACAGAGGTTGCATCGCGA	AGACATGCTGAAGTCTGTGTCGAAA	ACATGCTGAAGTCTGTGTCGAAG	GCGATGCAACCTCTGTGTATTGCTT
WRC1281	BS00075107	chr5D	547504910	CATTTATTCACCTGGACGCAAATTTCAAAGCTAGTGTAGCCAAGTAGTAA[S]CACTGAAAAGGAAATATGGATATATGGCCATATGATATGAGAGGGTAAAG	CCATATATCCATATTTCCTTTTCAGTGG	CCATATATCCATATTTCCTTTTCAGTGC	GCAAATTTCAAAGCTAGTGTAGCCAAGTA
WRC1282	BS00075667	chr6B	716290640	ATAGTCACATAATAAGCACGGTTCCCGCCGGTTTCTACCATGACTGAACA[R]GCCAAGAAATAGGAATTGGGGAGCTCGCCGTACGGTCTGCTGATTCCCAA	CCGGTTTCTACCATGACTGAACAA	CGGTTTCTACCATGACTGAACAG	GCGAGCTCCCCAATTCCTATTTCTT
WRC1283	BS00075815	chr5B	536047052	AGTTACAGCATTGCATTTGACCAAACATTTGGAGGCGCAAAAAGGTGTGC[Y]GAAACCACGGCCAAACCAGAAAACTAACAAACAATAGTGACTCGTCACGA	TCTGGTTTGGCCGTGGTTTCG	TTCTGGTTTGGCCGTGGTTTCA	ATTTGACCAAACATTTGGAGGCGCAAAA
WRC1284	BS00076169	chr5B	555179293	AGGGACTTCAACTGCCGGTTTGCAGCTGCGTCGTGGGGTTGGGGATTTGC[R]GCAGCCACGCCGCTGCACGCCGGACAAGATTTGCGCGCGTAGCAGAGAGT	GCAGCGGCGTGGCTGCT	GCAGCGGCGTGGCTGCC	TGCGTCGTGGGGTTGGGGATTT
WRC1285	BS00076192	chr1B	1779897	TCTACAATAGTTCTTGCAGAAGCCAAACAAGCTATACCAACAAGAGAGCC[R]GATCCACGAGGAATCCGAGTGCGCGGCATTTGTCGCCACTGGAACCGGTC	CACTCGGATTCCTCGTGGATCT	ACTCGGATTCCTCGTGGATCC	CAGAAGCCAAACAAGCTATACCAACAA
WRC1286	BS00076782	chr5B	14226014	TGGCGTCCACTCGCGTCCTCCACCTCATCATCGCCCTCGTCCTTGCCGTC[R]CCGTCGCCACAGATGCGGCCACCATCACGGTGGTGAACCGGTGCTCCTAC	CCGCATCTGTGGCGACGGT	CGCATCTGTGGCGACGGC	CCTCATCATCGCCCTCGTCCTT
WRC1287	BS00076982	chr2B	32871648	TCATGGCAAGTTAGGGCATGCATAGAAATAGCGTTAAGATGTTTGGAGGA[Y]GACCAAATGAAAAGACCTGCTATAGCGGATATTGTCAACGAGCTGAATGA	AAATAGCGTTAAGATGTTTGGAGGAC	GAAATAGCGTTAAGATGTTTGGAGGAT	CAATATCCGCTATAGCAGGTCTTTTCATT
WRC1288	BS00077891	chr7A	647235362	AGTCGAGGTTGATTAGACTCGATTGTAGGTTAATCTCTCGATTATGCCTG[K]GTTTTCGAGTAGATCTGTCGATTGGGATGCGATTGCTGTTGGTTTGATCC	AGGTTAATCTCTCGATTATGCCTGG	AGGTTAATCTCTCGATTATGCCTGT	CATCCCAATCGACAGATCTACTCGAA
WRC1289	BS00081698	chr4A	733788463	GGTACATCGTTACATTGTTGTCAAAGTTGCGACATGTTAATGCATCGCCG[M]CTATTTTTGTACATATTTCTTGGAGATGTTCTCGGGCTCTTAGGCCTGGG	GCGACATGTTAATGCATCGCCGA	CGACATGTTAATGCATCGCCGC	CCGAGAACATCTCCAAGAAATATGTACAA
WRC1290	BS00081724	chr4D	455343978	CCAAATGTAACACCTTATTTGTTTCAAGCCAAGCGGAACATGAGTGGATA[R]GAGGGATTTTTGGTGACAATGGATGTAGTGTTTGACATTTACCTTTCACA	CCAAGCGGAACATGAGTGGATAA	CCAAGCGGAACATGAGTGGATAG	TGTCAAACACTACATCCATTGTCACCAAA
WRC1291	BS00083352	chr7B	730115080	CGAACATGTAGATGGGCAAGGAGGATCGGACCAGTCGCTCACTCGCCTCG[S]TTGGTGTCGATCAAGCGAAGAAAGGGTGCGGCATGAACTGAATCTGTCTT	AGTCGCTCACTCGCCTCGC	AGTCGCTCACTCGCCTCGG	CCTTTCTTCGCTTGATCGACACCAA
WRC1292	BS00084357	chr3A	9855758	CTACAGTGTTCACATCCCTGGTGTGCTCAAATATACGCGTGATTGAGTTA[Y]GATTTAACCAGCCAAATTTCCAGTGCAGTAACTAGCCATGGAAATACAAT	CAAATATACGCGTGATTGAGTTAC	GCTCAAATATACGCGTGATTGAGTTAT	TACTGCACTGGAAATTTGGCTGGTTAAAT
WRC1293	BS00088726	chr4A	641504447	GTATGGTGGCATTTATGCGATGAATATTAGGTCTTACACATGTTCTTTTT[R]TACATATACGCCATGATACTTCGTATCCGAAGCTTACTTCAGCGGACCCT	GATACGAAGTATCATGGCGTATATGTAT	ATACGAAGTATCATGGCGTATATGTAC	CGATGAATATTAGGTCTTACACATGTTCTT
WRC1294	BS00089310	chr2A	738991297	TAGCAGGAAGCGGTCCCGAGATATTCAAGAGCTCGCCGGAGCCACAATCC[W]AGCACTTGTTCGCATCCACCTTGTTTCTCCTGCCGATCCTCTCAAGCCAA	CGCCGGAGCCACAATCCA	CTCGCCGGAGCCACAATCCT	GGAGAAACAAGGTGGATGCGAACAA
WRC1295	BS00089597	chr5D	552040060	GATGAATTTCTGGTGGACGCAGCTACAAAGCTTGAAGTTGAGAGAACAGC[Y]ACGCATAATTCTCCGATACAAAGCTTGAAGCGCGCATGAGTTCGGCTGAA	AAGCTTTGTATCGGAGAATTATGCGTA	GCTTTGTATCGGAGAATTATGCGTG	GGACGCAGCTACAAAGCTTGAAGTT
WRC1296	BS00089954	chr3B	542297567	GTTCCAACTGACATGAGATGGTCATCTCAGCAGTTCAACTCCCAGCTATC[R]TCGCCGGCTGCTGCGCCGCGGAGATGAGGGCCGTAACACCGTACACCGAT	AGCAGTTCAACTCCCAGCTATCA	GCAGTTCAACTCCCAGCTATCG	GTGTACGGTGTTACGGCCCTCAT
WRC1297	BS00093153	chr6D	385560808	GGCCGCCCTTGCCGGAGAGACGGACTGGGGACGATGGCACGCGCGCGTCA[R]CCCTTTCTCGAGGCGTAGAGTCGTCGTCGTCGTCGCCGCGGCAAATAATA	GATGGCACGCGCGCGTCAA	ATGGCACGCGCGCGTCAG	CGACGACTCTACGCCTCGAGAA
WRC1298	BS00097126	chr2D	27651426	TAATAGGACTCCAATATTTGGGGAACGCCAGATTTGGAGCCTCCTTCGAA[Y]GAACGTATTGTTACCCATGGGAGGAGGGAACGAGCGTTTGCTGGGACGTA	CAGATTTGGAGCCTCCTTCGAAT	CAGATTTGGAGCCTCCTTCGAAC	CTCCTCCCATGGGTAACAATACGTT
WRC1299	BS00099829	chr1B	59774244	CAGAAACTACAGCAGCACCTTGTGAGGAAAGCGTTTCTTCTCAAACTAAG[K]TATCATCACCTTCACTGCCTCTTGAAGTTGCAAAAATGGAAGTAGAACCA	AAGAGGCAGTGAAGGTGATGATAC	CAAGAGGCAGTGAAGGTGATGATAA	TGTGAGGAAAGCGTTTCTTCTCAAACTAA
WRC1300	BS00100706	chrUn	36096909	AAGCAAGACGGTGGCCTGAACTCATCGGGAACGGACAGGGTGCACACCTC[R]CCAGAGAGTGGGGCAAACACAAGAAGCTTTGCATACTCACGGTGTACAGC	CGGACAGGGTGCACACCTCA	GGACAGGGTGCACACCTCG	CCGTGAGTATGCAAAGCTTCTTGTGTT
WRC1301	BS00102783	chr4D	3135049	CGGAGGAATTTGGGCGCAGGAAGGATTTGGCCGGCGGGCTCCGGGATCTG[S]TCGTTTGGTCATTCTTCTTCTTGTTGATTTGATCGACTGGTAGGTGGGCG	AACAAGAAGAAGAATGACCAAACGAG	AACAAGAAGAAGAATGACCAAACGAC	AGGAATTTGGGCGCAGGAAGGATTT
WRC1302	BS00103682	chr4D	455342727	GCCAAATGGGAGCCTCGTCATGGCCAGTTCAGATTTCGACACCCATGGAG[Y]CAATACCAGAAGCTGGGAACTCTTTGTCGCCAATGTGCGTCTTCTATGGA	CAGATTTCGACACCCATGGAGC	CAGATTTCGACACCCATGGAGT	GACAAAGAGTTCCCAGCTTCTGGTA
WRC1303	BS00107222	chr5B	45237684	CGGCATCCAGCTGGTTATCTATGCAATATACAGGAACAGTAAGGTCGGCT[Y]TCAGTCTCATGACAGTGACGAAGCAGCATATGATGCTTCGGCTTCTCTTC	ACAGGAACAGTAAGGTCGGCTC	ATACAGGAACAGTAAGGTCGGCTT	CATCATATGCTGCTTCGTCACTGTCAT
WRC1304	BS00107639	chr4A	606586871	CAATGTGGCAGAGCTTGCCGGGTTTATCTCGCTCTACTTCGGCTTGGAGG[Y]GCTGAAACAAGAAGTCGAGGAAAAGGAAAAGCATGCGGCCGAGGCAACGA	TTCCTCGACTTCTTGTTTCAGCG	CTTTTCCTCGACTTCTTGTTTCAGCA	GGTTTATCTCGCTCTACTTCGGCTT
WRC1305	BS00109036	chr6B	663530611	AAGTTGTTGAGAAGCTCGAACAGCAGGACGAAAACCTGAAGGAGGTGTAC[Y]GAATCCTTGCCCATGAGCTTCCGGCAGAGTTCATGAGCCAACCCATTGGT	GAAGCTCATGGGCAAGGATTCG	GGAAGCTCATGGGCAAGGATTCA	AGGACGAAAACCTGAAGGAGGTGTA
WRC1306	BS00110209	chr2B	745579710	AGCTTGGACGGAGGCATCCGCGAGATGGTCTCCATCCATGGTGGCACAAC[R]GCTGATGATGGGCACTCCATATCGAACCTTGATTTTTCTGCTGCCTGTGC	CCATCCATGGTGGCACAACA	CCATCCATGGTGGCACAACG	AGGTTCGATATGGAGTGCCCATCAT
WRC1317	AX-95220434	chr1A	435398928	CCAGGGATAAAAGTCTGACCAACCATTCAGAATAAACTTTCCAACTGCGG[Y]GATTTCCTTACTGTGTGACTCATTGTAAGGTAAAAAATGTGACCACACAC	AATGAGTCACACAGTAAGGAAATCA	AATGAGTCACACAGTAAGGAAATCG	CCAACCATTCAGAATAAACT
WRC1318	AX-95081838	chr1A	584470711	TCTTGTGTGGTAATTGAAACTTATTTTCTGCTTCTTCGTTGCAGACGGCT[R]CACTACATGGCGGTGCTTTCAGGCCAGCTCGCATCGCACCAAGCAGCCAA	GAAAGCACCGCCATGTAGTGT	GAAAGCACCGCCATGTAGTGC	CTTGTGTGGTAATTGAAACTT
WRC1319	AX-94734232	chr1B	24491713	TCTTACTTCGATGAAATGCTCGTGAGCTACGTCCTCACCTTCCCTTTTGC[R]AGACTGTGACCGCATACTCAATTGTGCTCTGTTCGCTCCGTGCTGACTCA	TGAGTATGCGGTCACAGTCTT	TGAGTATGCGGTCACAGTCTC	GTGAGCTACGTCCTCACCT
WRC1320	AX-94735504	chr1B	24499188	GATCCATATTCTGGGCTCCTTCAAGACATGAATCAGTACCGCGCACTCCA[Y]AAGAAGCACGCATACGATGGATCTAAGAAGACGGGATTTTGTTCGTTCTG	CATCGTATGCGTGCTTCTTA	CATCGTATGCGTGCTTCTTG	ATATTCTGGGCTCCTTCAA
WRC1321	AX-95002025	chr1B	95497606	ATGCAAATAGAGCTGCACATGCAGTGGCTAGGTTGGGATATTCTTGTGAT[R]TAAATCCTGCCTTCCTGTGGGAGGATGATGTTCCAGCTGTAGCTGCAAAC	GCTAGGTTGGGATATTCTTGTGATA	GCTAGGTTGGGATATTCTTGTGATG	ACAGCTGGAACATCATCCT
WRC1322	AX-94898896	chr1B	121777538	TGCTTCGTGAGGATTGAAATGGCAGGTTGTGAGGGTGTTAAGTGCAGT[R]AAAATGCCTTTCAGCTGCTGCATTTGGTTCCAGTGAAAATGACAGGCTGTGT	TGTGAGGGTGTTAAGTGCAGTA	TGTGAGGGTGTTAAGTGCAGTG	TTCACTGGAACCAAATGC
WRC1323	AX-94621655	chr1B	412895813	TCATCATCGCTGCCATCTTATTCTAGCATGGACGGGAGTGGATATTCATC[R]TCAGGTCTCGGTGGTTACGGTTCCACTTACCGCTACTAAGCTGGTAGCTG	GACGGGAGTGGATATTCATCG	GACGGGAGTGGATATTCATCA	AAGTGGAACCGTAACCACCG
WRC1324	AX-94707270	chr1B	668245669	GAGTGGACTGGGATGAGGGTTGGGGAATCAAATGGGGAATCAAATGCTGT[M]CTGAACGTAGGAAATGGAAAGGTTACTGCAAATGGGTTCCACAAGGCAGG	AACCTTTCCATTTCCTACGTTCAGT	AACCTTTCCATTTCCTACGTTCAGG	GTGGACTGGGATGAGGGTT
WRC1325	AX-95202227	chr1B	672958501	TGTATCATGTGAGTCATCATTGATGAAGTAGTTTTAAGGTATTTGCCACT[R]CTTTGCCCTGTTTAGTTTACCTAAATTGCCTGACTGCAATATGTACTCTG	TTTAAGGTATTTGCCACTA	TTTAAGGTATTTGCCACTG	ATTGCAGTCAGGCAATTTAG
WRC1326	AX-95138616	chr1B	685092955	GGACGAGATCAATCCGGAGATCAGCCACAAGGCTGCTGCTTGGCTGAGGA[R]AAACGTATGGCACACAGAGTAACATCCACTAGCTTATCTGCACTAGCTAT	GTTACTCTGTGTGCCATACGTTTT	GTTACTCTGTGTGCCATACGTTTC	TCAATCCGGAGATCAGCCAC
WRC1327	AX-95087021	chr1B	687719554	GCTCTTGAACTTGATCGATGCCGCTTTCTGTCAGTGGAGGTTGAACCGTG[Y]GTCTGTATAAATAAAACCTACTAGTACCTATCTATCTATGTACTATCTAG	AGTGGAGGTTGAACCGTGC	AGTGGAGGTTGAACCGTGT	CTAGATAGTACATAGATAGATAGG
WRC1328	AX-94484454	chr1D	120601462	ACAGCAGCGGCACTCCGGTGGAACGCGGGGCGCCAGCGACTTCACATCCG[K]GCACCTGCATTCGGTGGAAGCACGGGAACGAGAGATTGAGCGAGAGACAA	GCCAGCGACTTCACATCCGT	GCCAGCGACTTCACATCCGG	CTCGCTCAATCTCTCGTTC
WRC1329	AX-94756243	chr2A	207055579	GTGATCGGCGATGGGACAGAAAAGATTGTGTCAGGACATACTACTGGTTCC[R]GACTGTGTTGGAATGCAACGCATGCACCGTGAACTGGCGGCAGGCCAGG	TTGCATTCCAACACAGTCT	TTGCATTCCAACACAGTCC	ACAGAAAAGATTGTGTCAGGA
WRC1330	AX-95122788	chr2A	333730551	GTGGGGAAACACGAAATGCGGGAATCTGCGATGCTGCCAATTTATTATAT[R]TGTGGTTTCCCGTGGAAATAAATACGTCTCGGCTTTGGAATATGAGCAAG	TTTATTTCCACGGGAAACCACAT	TTTATTTCCACGGGAAACCACAC	ACGAAATGCGGGAATCTG
WRC1331	AX-95174531	chr2A	445337499	GCTATTCCTCAGCCAGCAACGGAGAGAATTGTTCCAAACGATAATAGGCT[R]GCTACTTGTTTCCATACCTTTATCTTCCAACTGGGATTAGCGGAACAACA	GTTCCAAACGATAATAGGCTA	GTTCCAAACGATAATAGGCTG	CGCTAATCCCAGTTGGAAGATA
WRC1332	AX-94452236	chr2A	619809051	GCCGCGGTGACGATGGCTAGAAGAAACTGCTCCAGCTACTGTGGTTATCC[S]TCGAACCCGCCGCCGCCTTATCCGTTTGGAGTAGGGCCTTCGTGCTCCAT	GCTCCAGCTACTGTGGTTATCCG	GCTCCAGCTACTGTGGTTATCCC	ACTCCAAACGGATAAGGC
WRC1333	AX-94655393	chr2A	712346654	GTCTAGCGTATATTGCGCCGTATGTTACGTGCATCTACTGTGCTTATATTGCA[S]CGTATGTCTAGCGTATTCTAATAAGAACAATTGGAACGGTGCACTTT	TTATTAGAATACGCTAGACATACGC	TTATTAGAATACGCTAGACATACGG	TTACGTGCATCTACTGTGCT
WRC1334	AX-94565732	chr2A	776164480	GGTCAAGTGTCTGCAAAAACTGTAGATTTCCAATTTCTTCTGGAAGCTTA[R]TGCAAACATCATAGAAATAATGGTATGCCTGGCTTAGCCTCAGATACCTC	CCAATTTCTTCTGGAAGCTTAA	CCAATTTCTTCTGGAAGCTTAG	AAGCCAGGCATACCATTATTT
WRC1335	AX-94978352	chr2B	105412639	AATTTTGCTCACTTTCTTGGTGTCTCGCAGAACTACCCTTACTATTTTCT[K]CACGTATATTGCTAAGATTAGGTTGACCCCTCTGTAGAATGCCAGCATGT	GAACTACCCTTACTATTTTCTG	GAACTACCCTTACTATTTTCTT	CTGGCATTCTACAGAGGGGT
WRC1336	AX-95087061	chr2B	209136288	GAGTCGTGTGCCGGGACCACTTGGGAGGTTTCCTAGGCTCTTCGGATATG[R]CTTTTAATCACATTGTTGATCACACCACGTTATAGGCCCTTGCTTGCAGA	GTTTCCTAGGCTCTTCGGATATGG	GTTTCCTAGGCTCTTCGGATATGA	ATAACGTGGTGTGATCAACAATG
WRC1337	AX-94876840	chr2B	795064905	TGTAGGCGACAAGGAAGATAAGGTCTAGCAAGGCAATACTCCCATATTCA[M]GAGCCGTTCATTTCAGCGGTTGACGGTACATTACAGTTTGGCACACAGAT	CGCTGAAATGAACGGCTCT	CGCTGAAATGAACGGCTCG	AAGGTCTAGCAAGGCAATAC
WRC1338	AX-94484900	chr2D	555166763	GAACAGCTCTGCATGATAGGTATAACAAGTTGTGTTGTCGTCTTATTCTC[R]AATAACTAGCTGCAACTGCATTTGTGTTGCGTTGTGGCGTGATCATTGGA	CAAATGCAGTTGCAGCTAGTTATTT	CAAATGCAGTTGCAGCTAGTTATTC	ACAAGTTGTGTTGTCGTCTT
WRC1339	AX-94451285	chr3A	441066	AAGGTACATGCGATACTATGCTTGTGTGCCACATCGCTACGAGCATCCTA[S]AAGTGAGATCACACCAACACCAGCCTTTTTCGAACCATAGGATTACTGCC	CATCGCTACGAGCATCCTAG	CATCGCTACGAGCATCCTAC	GGCAGTAATCCTATGGTTCG
WRC1340	AX-94913674	chr3A	99584966	CCAGCCAATGTCTCCAACATCCCTCTCCTTTTGCAGCAGCGAATACCACA[Y]CAATCTGTTGGTACCTTCTCATCACCAATGTCATCAGCACGCTATCCACC	GCAGCAGCGAATACCACAT	GCAGCAGCGAATACCACAC	TGATGAGAAGGTACCAACAGATT
WRC1341	AX-94451297	chr3A	235213474	CAACTGCAAGCAAACGTCAACCCCAATCAAATTCATGGTCATGCACTCTA[Y]AGCCTACATTCCAGAAATTCAAAGAATGGAGCTCCTCGGTTGCGGAATCA	CAAATTCATGGTCATGCACTCTAT	CAAATTCATGGTCATGCACTCTAC	TCCATTCTTTGAATTTCTGG
WRC1342	AX-95070990	chr3A	737801621	GAATGACCAAAGAGATGCCAACAAAACCCCACCACCGAAGCTGGCACCCT[R]CTAAGCCAACACGTTGAGGCCAACCACAAGTCCCTACTACGGCACCCGCG	GCCTCAACGTGTTGGCTTAGT	GCCTCAACGTGTTGGCTTAGC	AATGACCAAAGAGATGCC
WRC1343	AX-95096469	chr3A	740300372	ACAGGTTACATGATAACAATAGAACAATACGATTCAAACACTTTTGGGAG[R]TCTAGCACATGGAATGATTCCCTTGAGAGGAGACTACGCCACGCATGAGG	GAATCATTCCATGTGCTAGAT	GAATCATTCCATGTGCTAGAC	TAGAACAATACGATTCAAACACTT
WRC1344	AX-94451310	chr3B	216571449	AGCAGCGTCCTCCACCATTGGCTGCTATGCTTCATCGAATGGCGTTCTAC[W]GTCTACATGGCCTATCACATACTTCTACTGGTTGTCCAAGCCTCTGAATG	AAGTATGTGATAGGCCATGTAGACT	AAGTATGTGATAGGCCATGTAGACA	ATTGGCTGCTATGCTTCAT
WRC1345	AX-94640578	chr3B	360108806	AGTCTTCTTCAGAACTGTCCTACGTAACACGTCTTACATTTACTGCCTCG[R]AAAACTCTGCCCTTTCCATGTTTCACTATGCTTTTACAGAAAAGCATGTG	AACATGGAAAGGGCAGAGTTTTT	AACATGGAAAGGGCAGAGTTTTC	AACACGTCTTACATTTACTGCCTC
WRC1346	AX-94485572	chr3B	485693079	CAGTTGGTGGGTGAGTAAATGGGAGGATAGGCTCTCCTACTGACCTTGCC[S]AAATGTGGATCAAAGAGAGGGATTATGGGGCAACATACAGGGGCCGGCAG	AATCCCTCTCTTTGATCCACATTTC	AATCCCTCTCTTTGATCCACATTTG	TAAATGGGAGGATAGGCTCT
WRC1347	AX-95153265	chr3B	512515274	AAATAAGCTAATGCCAGCAAACTGACTGAATTTAAGTTCCAGCTCCTTCT[K]TGACTTTGGAAGGCTGTTGACGAATGCCAAATAATCCAAGTTATGATGGA	TGAATTTAAGTTCCAGCTCCTTCTT	TGAATTTAAGTTCCAGCTCCTTCTG	ACTTGGATTATTTGGCATTC
WRC1348	AX-94701330	chr3B	576022348	GCGAAAATGATCAAGCACCCAGTCCACTAGCATCTCGTGACTGTCCTGCG[R]GCCATTGCTCACCGGCCTTCGCCCACAGGTTATCTCGAGAAGGAACGCGC	CTCGTGACTGTCCTGCGA	CTCGTGACTGTCCTGCGG	CCTTCTCGAGATAACCTGTG
WRC1349	AX-94485984	chr3B	817009886	ATTTGACAAAATCACAACCTAAACTCCGAAAGAAATTCAATGGTGATGTT[R]GCAGAAGGATGATGTGGCCAAAATGATCTCATCAACTGCGACCTCACAGC	CGAAAGAAATTCAATGGTGATGTTA	CGAAAGAAATTCAATGGTGATGTTG	AGGTCGCAGTTGATGAGAT
WRC1350	AX-94643562	chr3D	554420789	TCGGTATGCAGCCATCTTCTTCCTACGAGAGGCCATTCTCCGGCCAAATC[K]TGTTGCGTAAGACTCTTGTTCCATATTTAGCACCAGTCCAAATCAAATCA	CATTCTCCGGCCAAATCT	CATTCTCCGGCCAAATCG	TGGTGCTAAATATGGAACAAG
WRC1351	AX-94452559	chr3D	575534148	TTTCTTCTGCAAGTACATGAAGCTCTCCTTGTGATTGCATCCTCCTATGC[S]TGAATTCTCTTCTATCGACTCAAGAACCGTCAAGTTTCAGCGCCGCCTCC	GTGATTGCATCCTCCTATGCG	GTGATTGCATCCTCCTATGCC	AACTTGACGGTTCTTGAGTC
WRC1352	AX-94870874	chr3D	593484616	GTAGTATGCAACGTTGCCACTTTAGGCGCTCTATGAAGTGTAGACAATGG[Y]TGTGCTCTGAAATGTTCTTCAGAGAAGCACACTATTGTATATTATGTGAT	TCTGAAGAACATTTCAGAGCACAA	TCTGAAGAACATTTCAGAGCACAG	CACTTTAGGCGCTCTATGAA
WRC1353	AX-94732845	chr3D	613394940	TGTGTATGGGTATTGCACCATGGCCATCGGAACATCCCTCAAATTCGTCC[S]TAGTTACAACACCCGGATCACCTACCTTGACAAGCTCAAGACCCACAGTG	ACATCCCTCAAATTCGTCCG	ACATCCCTCAAATTCGTCCC	TTGTCAAGGTAGGTGATCCGG
WRC1354	AX-94712482	chr4A	85578483	GTGGGAAAGTGATTTACCGCTGAAAACCAAACGCAAGAGGTGGCTGGCGT[Y]ACACGCCTGCATGTTTAGATAGGCTGATGTGGCAAGTGATGAGGTGGATA	CAAGAGGTGGCTGGCGTT	CAAGAGGTGGCTGGCGTC	ACTTGCCACATCAGCCTAT
WRC1355	AX-94561264	chr4A	90419721	GCTGAAAAAGGAGCCTCCAAAGCTTGTGCCATGTCCGGGTCAATCGCCCC[Y]AGTCGTATCTCATCAAGGTTGATCAGCCTAGGACGCTCTTTGGGTGTGCC	GATCAACCTTGATGAGATACGACTA	GATCAACCTTGATGAGATACGACTG	CCAAAGCTTGTGCCATGT
WRC1356	AX-94931390	chr4A	201759267	TTTCGCGGCGGTATCTCATCTGCTACTGTTAATTTCGCGCTGCTGCTCCT[R]TTGCTGTGGTGTTCTCCGAGCCCTGTGTCTCCCTTCTTCCCCCAACGAGC	CTCGGAGAACACCACAGCAAT	CTCGGAGAACACCACAGCAAC	ATCTGCTACTGTTAATTTCGC
WRC1357	AX-95202867	chr4A	277889699	TACAGTTAGAAACAAGGCTGCAAGGAAATAATACGTGTCTCCAAATAACA[R]CAACTCTAGCCCAAAATGTAACCATGCAATGTACCAAGGAAAAGATTCCA	AATAATACGTGTCTCCAAATAACAA	AATAATACGTGTCTCCAAATAACAG	GGTACATTGCATGGTTACATT
WRC1358	AX-94451403	chr4A	599344762	CCAATCTCCGTGAGCTGCATATCACGAGGTACCCTGGGAAGAAGCTGCCT[R]CCTGGCTGTGGCAGATGACAAACCTGACCAGCCTGTACCTTACCAGCTGC	CCTGGGAAGAAGCTGCCTA	CCTGGGAAGAAGCTGCCTG	GTACAGGCTGGTCAGGTTT
WRC1359	AX-94841609	chr4A	627822348	ACCATGTCTGGCCAAGTAGCAGTTTTGCTTCCGAGCCTGAGCACAAAGGG[Y]AACAATTGAATCATGACTGTGCAAGCAAACAGGATGTATGATACTATCAC	GAGCCTGAGCACAAAGGGT	GAGCCTGAGCACAAAGGGC	CATACATCCTGTTTGCTTGC
WRC1360	AX-95123359	chr4A	674336592	AAGCGGCGATTATCGAGCCTCAGCGAGCTGTGCCCACTGCTGCTCTGAGC[R]TGTGACGGTGCGATAATCGCCTTGTTCCCATCGTGATGATGTTGCTAGTT	CGATTATCGCACCGTCACAT	CGATTATCGCACCGTCACAC	ATTATCGAGCCTCAGCGA
WRC1361	AX-94763720	chr4A	743868340	CAATACTTGGGGTCCCTAGAGATTGCCCATGTGTTGGTAAGCACAATCAT[Y]CCTCGTGTTACATCATATCCTTGAATCTTGTAGTCTCCCACACACACTCT	CATGTGTTGGTAAGCACAATCATT	CATGTGTTGGTAAGCACAATCATC	AGAGTGTGTGTGGGAGACTA
WRC1362	AX-94451852	chr4B	21384214	GGTCAGATGGATACTCCCTGGAACATTAAGCATTTATGGAGACTCTGAAC[Y]GCATTTGACATCCATTTTAAGGCAAACATCGACCTGACCCGCTGGCTCGT	TAAGCATTTATGGAGACTCTGAACT	TAAGCATTTATGGAGACTCTGAACC	CAGGTCGATGTTTGCCTT
WRC1363	AX-95130149	chr4B	28489932	TCTAGTTCAGTTTCACACTATTGTTTGTGTGCCAGGATTGGATGATGTGA[Y]TGGCACCCAGATCTGTATGTTTGCATAGATTGAGCCTTATACAGCTCACC	GCCAGGATTGGATGATGTGAT	GCCAGGATTGGATGATGTGAC	TGCAAACATACAGATCTGGG
WRC1364	AX-94881176	chr4B	398559983	AATGGTTTGTTGTCTAGCTATAGATGAAGTTGGAAGTGAGATGGTGGTAC[Y]ACCCGTACCCTACTGTATGTAGCACTGATGGAATACATGATATTTCATTA	GGAAGTGAGATGGTGGTACT	GGAAGTGAGATGGTGGTACC	ATCAGTGCTACATACAGTAGG
WRC1365	AX-94451413	chr4B	601539402	GTGTTCCGTAAGTATGTGTAATATAATGAAGATACGCCTTCAGTCATGCA[S]TGTTTGAGGAGTTAGCTCACTAGTCAACACCGGCGGCTAGCTAAGCAGAA	ACTAGTGAGCTAACTCCTCAAACAC	ACTAGTGAGCTAACTCCTCAAACAG	TATAATGAAGATACGCCTTCAG
WRC1366	AX-94711362	chr4B	636916749	GGTGACTATCAGCCTAGAACTTGGTCACACCCAACATAAACAATCGGCAG[Y]CTCACCATACCCACCGCCGTTCCTGCCATGACTTCGTCATCAGCGATCCC	CCAACATAAACAATCGGCAGT	CCAACATAAACAATCGGCAGC	ATGACGAAGTCATGGCAG
WRC1367	AX-94854031	chr4B	657295694	CACATATCGTGTTCACTTGAGCTAAGCAACGCGAGAGAAGACTGCGTCGC[Y]TTCCACATCGAACCGCCAAGCACACGGCACTACCGGATAGAGCCCAACAG	GAGAGAAGACTGCGTCGCT	GAGAGAAGACTGCGTCGCC	CTCTATCCGGTAGTGCCGT
WRC1368	AX-95243255	chr4D	297206435	TCAGGCTTCAGGTCACGGTGATAGACGCCTCGGCTGTGACAGAAGTCAAC[Y]GCACTATTGAGCTGTTGGAAGTACTTGCGAGCAACATCTTCTTTCAGCCT	CCAACAGCTCAATAGTGCG	CCAACAGCTCAATAGTGCA	AGATTTTCAGGCTTCAGG
WRC1369	AX-94997217	chr4D	450510629	CTTGGCGGGGATACTTCGAAGATTTCCCTTGTGAAGAGATCAGTCTCAAG[Y]GTCTGTGCTGATGTATCAGAGTTTCATCCAAGTATCAAGAACTGGCAGAC	CTGATACATCAGCACAGACA	CTGATACATCAGCACAGACG	GGGGATACTTCGAAGATTTCC
WRC1370	AX-95074571	chr4D	480873984	GACGGGGAGCATTTCGGTTTTCTTCCGACCAAATTCTCAGTTCTGCCTGG[Y]GCAGTAGATTTCTTCAGCTAGATCGCTGTGCTGTTTCTTCCTGTTGGATG	AAATTCTCAGTTCTGCCTGGT	AAATTCTCAGTTCTGCCTGGC	GGAAGAAACAGCACAGCGA
WRC1371	AX-94484110	chr5B	663119554	CCGGTGATGGAAGGTCTGGAATTCTTCAAAGATGGAGAGGCATGGTAAGT[R]ATTTCTCCGGTACTGACGCTGAAGACCATTGGCCAACTTCAAGCAGGACT	AAAGATGGAGAGGCATGGTAAGTA	AAAGATGGAGAGGCATGGTAAGTG	AATGGTCTTCAGCGTCAGT
WRC1372	AX-94485245	chr5D	550191115	TTGTCGACTCCAGTGGGGGGCACCGGGTACTCATCCTCAACACCTGGTGG[M]TGCTCGGGCTGAACCTCAGTTACTGTCCTGACGGGCTCAATGGTATCTTC	CATCCTCAACACCTGGTGGA	CATCCTCAACACCTGGTGGC	TCAGGACAGTAACTGAGGTTC
WRC1373	AX-94801219	chr6B	133363858	CACGAAAATCAGACTTAATGTTTGGTAAAACATGAAGCTCCAGTCCCTAT[R]GATATCGTCTAGATCAAGGATATAAATTATCGTCTGCATCCAACTGGTGT	acatgaagctccagtccctatA	acatgaagctccagtccctatG	accagttggatgcagacgat
WRC1374	AX-94452922	chr6B	422699888	CAGCTCCGGGATGTCCGGGGCACGCTGCTGCCGCTCGTGCAGCAGAATGG[M]GGCCGCAGCGGCGATGCAAAAGTTCTTCGTTCACTTCCACGTCCCGAAAG	ctcgtgcagcagaatggC	ctcgtgcagcagaatggA	gggacgtggaagtgaacgaa
WRC1375	AX-94486099	chr6B	526482358	GTGCTTCATTCTGTAGCCCCAGTAGCTCATCAATGGTGAAGAACACATCA[R]TGGATGGATCAACGTTGGCAAACCTGCATCAGGAAACCGTGCAAAATGAT	TCATCAATGGTGAAGAACACATCAA	TCATCAATGGTGAAGAACACATCAG	TTTCCTGATGCAGGTTTG
WRC1376	AX-94767262	chr6B	715976956	TCTGTCCAGAGAAGCCTTTACAGCGTCAACAAGTTTCGTTGTCATAGGCC[Y]ACAACCTAGGTGACATTTGAAAGTGGTGAGTCTGGACAGGTTTTCGATCC	caagtttcgttgtcataggccC	caagtttcgttgtcataggccT	acctgtccagactcaccact
WRC1377	AX-94832799	chr6D	198601226	AAAAAGAGCAACAGATCTTGTAATCTTCTTTGAACGACACTTATTCTGGC[M]GAGTGCGTACAATCTGATACTCCCTCTGATGTGAAATATGTTTTGTGGTT	tgaacgacacttattctggcC	tgaacgacacttattctggcA	tgcttccataagtgccaaca
WRC1378	AX-95178077	chr6D	452632758	GGGATGGGCTAGGCTTTGAGGGCAGGCAAGCTGCTGACTCAAATCGCAAT[R]ACATTGGATTGGCGGGTGCAATCATCAACGGCGAGGGAGAAATGTTTGAC	CTGCTGACTCAAATCGCAATA	CTGCTGACTCAAATCGCAATG	CAAACATTTCTCCCTCGC
WRC1379	AX-94451218	chr7A	17331476	TCATCTCATCCTCGACTTCGTCCGATCCTAAGTAGCCAGCTACTCTGTAC[R]TAGTTCGGGCTAACAATGAGGAGCTGCAGGTGTGTAAATTTGCAATCAAG	cctcattgttagcccgaactaT	cctcattgttagcccgaactaC	ctcatcctcgacttcgtccg
WRC1380	AX-95182725	chr7A	133671790	TCCAACCGCTCAACTCGCATCGCATGAGCAGAATCTTGCTAAGGCATGTG[S]ACCTACCTAAGCCAGTAAAATGTACAGATCCAACCGCTCCTAGAACAAAA	acattttactggcttaggtaggtC	acattttactggcttaggtaggtG	cgcatcgcatgagcagaatc
WRC1381	AX-94452832	chr7A	448594506	GCAGTGATTCGTTCCTTATTTGCGTCCATCTCACTTGATTAGGATGTGCT[Y]GACGGCGCGTGCGCCAACGCACGGTGAGGTCAGGTAGCTGGTAGAGCATA	tctcacttgattaggatgtgctT	tctcacttgattaggatgtgctC	ctacctgacctcaccgtgc
WRC1382	AX-95123157	chr7A	541900349	ATAATCAAATCAATCGGCGGCGACGGGACGATACGGACGCGCATGATTTC[K]GAAAATAACCTCAGCTCCTGTGTACGTGCACCGATGTGTAAGTGCGTAAT	cacaggagctgaggttattttcC	cacaggagctgaggttattttcA	aatcaaatcaatcggcggcg
WRC1383	AX-94585564	chr7A	644462437	CTAGTCCGCCTCATAAAGAACACTGGTCTGCGAGCCAAGCCCCTGTTTTC[R]GTGAAGTTCGACAGCTCTGATATCCCTGCGGCTGGTGATAGGGCGTTTGG	gagccaagcccctgttttcA	gagccaagcccctgttttcG	taagccccaaacgccctatc
WRC1384	AX-94486306	chr7A	727125080	TTAGCATTGCTCACATTCCCACGAATCGAGTTGACCATGGCCACTCACCC[M]AATTTCCATGCTATTCCATTTACTGGGTCCGTGGAGAACACCGAGTTTAG	accatggccactcacccC	accatggccactcacccA	tgttctccacggacccagta
WRC1385	AX-95194676	chr7B	255560800	CAATACAATGCAGAATGCGGTAGTTCTGATACAGACTCAAAGCTGGGCCT[R]TGGATTTACTTTAGTTGTCACTAAATTCACCATGTTCATGAAGCGATGTT	cagactcaaagctgggcctA	cagactcaaagctgggcctG	acatcgcttcatgaacatggtg
WRC1386	AX-94452262	chr7B	328183227	ACTGCACAATTACAGTTGTGTGTCTGATGGTGTGAGTTAGCAATCATCCG[R]CGGCTAAAGTGTAAACCAAGTATGGAGCCAGTGCGTACAATAATATTTCT	CATACTTGGTTTACACTTTAGCCGT	CATACTTGGTTTACACTTTAGCCGC	GTTGTGTGTCTGATGGTGTG
WRC1387	AX-94594966	chr7B	391495256	CCCTGTCCCGCTCAGGTTTCCCAATACACGCAGTAAGCGATCACCACGCA[R]TACCCGCTCCGAGCCGGAAGCTGTTTCTGCTATTGCCTCACTCCCGAGCC	CAGTAAGCGATCACCACGCAA	CAGTAAGCGATCACCACGCAG	GTGAGGCAATAGCAGAAACA
WRC1388	AX-94703505	chr7B	415444986	TCATCATCCATAAATTGAGTAACTTAGTTGACAACTCCATTATTCCTGTC[K]CTGCTGACAATTTGATGCTCCTGTTTTTCCGTGTGTTCAATCACCGCACT	GTTGACAACTCCATTATTCCTGTCT	GTTGACAACTCCATTATTCCTGTCG	GTGCGGTGATTGAACACA
WRC1389	AX-94950416	chr7B	478481876	GACTCAAGCGAGCGCAAGTGAGGCAACAAGAGGAGGCGTCATCGCAGGAC[R]GCAATAGCAACAGACTCCTTGAACAAGTGCAACTGACCGTGAAGAACCTT	GTTCAAGGAGTCTGTTGCTATTGCT	GTTCAAGGAGTCTGTTGCTATTGCC	CAAGTGAGGCAACAAGAGG
WRC1390	AX-94485089	chr7B	579439621	TGGTCAGACCAGTAAGAGGCCAAGGCAAATGGCAGCTAACCTCGCCATTG[K]GGACATGTATGAGAGAACAGGGGATCACCTCGCCGTTAACAATTAGAGTT	CCCTGTTCTCTCATACATGTCCA	CCCTGTTCTCTCATACATGTCCC	AGACCAGTAAGAGGCCAAG
WRC1391	AX-95137090	chr7B	659424705	ATAAATCAATAAGCTCTCTGTTGTAAGCATCCACCACTTCATCACCTGTC[Y]TGTGGATCTTCTTAAATTGGTACCTTATTGCTTCCANNNNNNNGTCGGAG	ATCCACCACTTCATCACCTGTCT	ATCCACCACTTCATCACCTGTCC	CTCCGACTGGAAGCAATA
WRC1392	AX-94997586	chr7B	693169197	ACGGCATGTGTAAGCTGGAAATCACTGTCGCCTGGTCTCTTATCCTGAAG[Y]ACCCACCGGTTGGTGGTCTACCTCCAACCAGTTGATCAAGGGAGGCTCTT	GCCTGGTCTCTTATCCTGAAGT	GCCTGGTCTCTTATCCTGAAGC	GATCAACTGGTTGGAGGTAG
WRC1393	AX-94485276	chr7B	739446892	ACCCCGCCCCTACAGGGGGTGTGACCGCAGCAGTCGTAGGCGTGGGCTTG[R]ACACTGCATCAGGACCAAACCCTGGAGGGTAGGGAGGGGTCACTGCTTCC	GGTTTGGTCCTGATGCAGTGTT	GGTTTGGTCCTGATGCAGTGTC	GTGACCGCAGCAGTCGTA
