# Supplementary material for: Generation of Doubled Haploid Wheat-Triticum urartu Introgression Lines and Their Characterisation Using Chromosome-Specific KASP Markers
Source: Front Plant Sci. 2021 May 13;12:643636. doi: 10.3389/fpls.2021.643636 (PMC8155260; doi:10.3389/fpls.2021.643636)
Supplement: Supplementary file 3 [file Table_3.xlsx]

## Sheet: Table S3
	Table S3. Genomic positions for each KASP SNP on the wheat reference assembly (RefSeqv1) and the Triticum urartu (Tu) genome sequence (Ling et al. 2018) with KASP markers organised into seven linkage groups and ordered primarily according to the Tu genome position.
	KASP ID	Wheat Chr	SNP_Pos	Tu Chr	start	end
	WRC1002	1A	30636156	Tu1	37823470	37823626
	WRC1064	1A	14000000	Tu1	145670560	145670752
	WRC0010	1A	100973308	Tu1	113659451	113659551
	WRC0016	1A	201694181	Tu1	176908791	176908984
	WRC0013	1A	180172176	Tu1	231725805	231725996
	WRC0022	1A	291673124	Tu1	300805346	300805540
	WRC0024	1A	333221724	Tu1	332897332	332897521
	WRC0028	1A	376476296	Tu1	376527461	376527655
	WRC0032	1A	439442926	Tu1	440430165	440430360
	WRC1066	1B	522650669	Tu1	486090121	486090316
	WRC0040	1A	517083952	Tu1	512319184	512319378
	WRC0042	1A	522114902	Tu1	523126687	523126806
	WRC0142	1D	472534499	Tu1	554387203	554387291
	WRC1055	1D	477907552	Tu1	561620023	561620178
	WRC0143	1D	477907633	Tu1	561620106	561620292
	WRC0145	1D	4.77908e+08	Tu1	561620312	561620465
	WRC1067	1B	628660920	TuUngrouped_contig_6117	8540	8699
	WRC0045	1A	581463261	TuUngrouped_contig_6299	1788	2098
	WRC0151	2A	16525785	Tu2	17735349	17735489
	WRC0253	2D	30748908	TuUngrouped_contig_4247	2608	2771
	WRC1056	2A	673007121	Tu2	37095135	37095164
	WRC0153	2A	81784492	Tu2	76915867	76915967
	WRC0156	2A	127000000	Tu2	129385868	129386059
	WRC0161	2A	166850871	TuUngrouped_contig_5239	1541	1721
	WRC0175	2A	415265180	Tu2	161843682	161843711
	WRC0163	2A	192200000	Tu2	182428189	182428384
	WRC1329	2A	207055579	Tu2	207070523	207070623
	WRC0168	2A	3.3373e+08	Tu2	276670617	276670781
	WRC0181	2A	555481936	Tu2	324953739	324953842
	WRC0212	2B	2.65435e+08	Tu2	363670737	363670926
	WRC0164	2A	240803641	Tu2	364845279	364845471
	WRC0178	2A	474880397	Tu2	462282709	462282899
	WRC0180	2A	529635629	Tu2	513278258	513278358
	WRC0183	2A	559996897	Tu2	537732519	537732674
	WRC0278	2D	450395546	Tu2	573924675	573924816
	WRC0187	2A	608000000	Tu2	590444341	590444441
	WRC0188	2A	608611178	Tu2	590954592	590954787
	WRC1091	2A	676238577	TuUngrouped_contig_9234	1654	1679
	WRC0191	2A	6.73007e+08	TuUngrouped_contig_3917	22738	22718
	WRC0236	2B	625544491	Tu2	649329110	649329251
	WRC0193	2A	7.0692e+08	Tu2	682567833	682567933
	WRC0292	2D	627167626	Tu2	732526124	732526282
	WRC0264	2D	2.29796e+08	Tu4	581283755	581283887
	WRC0295	3A	27533161	Tu3	21754903	21755003
	WRC0395	3D	26165169	Tu3	33240935	33241047
	WRC0302	3A	83722531	Tu3	76885084	76885328
	WRC0399	3D	84673499	TuUngrouped_contig_8645	687	731
	WRC0326	3A	550414393	Tu3	100499914	100500014
	WRC0308	3A	175933119	Tu3	158496718	158496844
	WRC0307	3A	175933117	Tu3	158496720	158496883
	WRC0314	3A	311989342	Tu3	275439404	275439591
	WRC0312	3A	250042017	Tu3	314664802	314664936
	WRC0317	3A	401024048	Tu3	376688702	376688802
	WRC0367	3B	405077699	Tu3	407762439	407762591
	WRC0318	3A	420837728	Tu3	410524116	410524310
	WRC0411	3D	321420783	Tu3	436863044	436863198
	WRC0327	3A	568143508	Tu3	562288007	562288134
	WRC0378	3B	605888602	Tu3	593083734	593083893
	WRC0332	3A	6.42959e+08	Tu3	633559396	633559524
	WRC0381	3B	669035502	Tu3	634481121	634481202
	WRC0333	3A	657232027	Tu3	646019866	646020059
	WRC0384	3B	736810594	Tu3	680712519	680712714
	WRC0051	1B	51849807	Tu3	726911110	726911225
	WRC1264	4B	5.82467e+06	Tu4	5631451	5631533
	WRC0521	4D	21151159	Tu4	24423909	24424007
	WRC1010	4A	548053472	Tu4	56846572	56846811
	WRC0711	5D	565201688	Tu3	59592897	59592928
	WRC0441	4A	38742300	Tu4	74851967	74852037
	WRC0523	4D	77126095	Tu4	109864958	109865118
	WRC0461	4A	330085799	Tu4	211080414	211080571
	WRC0456	4A	242877589	Tu4	259168079	259168269
	WRC0463	4A	450792527	Tu4	346205665	346205765
	WRC0453	4A	178842383	Tu4	392497027	392497194
	WRC0449	4A	141123869	Tu4	442947903	442948109
	WRC0447	4A	90420111	Tu4	491102571	491102705
	WRC0440	4A	1.18114e+07	Tu4	572822998	572823087
	WRC0438	4A	9909413	Tu4	576715299	576715489
	WRC0473	4A	621768258	Tu4	606483492	606483648
	WRC0664	5B	7.08407e+08	Tu4	616848229	616848363
	WRC0472	4A	606586887	Tu4	617304185	617304267
	WRC0666	5D	3031995	Tu5	3205199	3205321
	WRC0665	5D	3031899	Tu5	3205272	3205426
	WRC0560	5A	13409141	Tu5	15248334	15248461
	WRC0673	5D	46980951	Tu5	44859719	44859890
	WRC1132	5A	46234071	Tu5	53206168	53206268
	WRC0566	5A	91118924	Tu5	91463323	91463514
	WRC0569	5A	113607495	Tu5	117982638	117982819
	WRC0899	7A	670887316	Tu5	180186419	180186572
	WRC1016	5A	259091622	Tu5	265256949	265257081
	WRC0574	5A	194740183	Tu5	277256770	277256945
	WRC0581	5A	327435627	Tu5	299246208	299246370
	WRC0688	5D	251426271	Tu5	315686968	315687155
	WRC0586	5A	4.27002e+08	Tu5	408123817	408123917
	WRC0638	5B	418303986	Tu5	432629967	432630119
	WRC0597	5A	549800942	Tu5	519756913	519757052
	WRC0599	5A	595538096	Tu5	232566179	232566143
	WRC1135	5A	575702531	Tu5	539880375	539880475
	WRC1136	5A	575702699	Tu5	539880543	539880643
	WRC1138	5A	677130733	Tu5	631688161	631688260
	WRC0605	5A	688666375	Tu5	637433854	637434011
	WRC0607	5A	702000349	Tu5	652748582	652748681
	WRC0608	5A	702000440	Tu5	652748668	652748792
	WRC0713	6A	1881041	Tu6	2841903	2842095
	WRC0811	6D	3917421	Tu6	5163938	5163987
	WRC1158	6A	2.43319e+07	Tu6	21630262	21630362
	WRC1233	6A	18704912	Tu6	24530842	24530942
	WRC0814	6D	35489055	Tu6	41943461	41943579
	WRC0762	6B	50124591	TuUngrouped_contig_4986	8008	8100
	WRC1249	6A	51409130	Tu6	47034293	47034393
	WRC0823	6D	157440994	Tu6	207425737	207425919
	WRC0720	6A	57725760	Tu6	54272090	54272262
	WRC0721	6A	91900005	Tu6	90747211	90747403
	WRC1159	6A	74499322	Tu6	69816109	69816209
	WRC0725	6A	121975575	Tu6	121785838	121785938
	WRC0730	6A	222695944	Tu6	200812992	200813092
	WRC0825	6D	157442340	Tu6	207424360	207424534
	WRC1019	6A	357872215	Tu6	335037056	335037235
	WRC1020	6A	378453011	Tu6	369823803	369823956
	WRC1021	6A	438491147	Tu6	384225045	384225196
	WRC1160	6A	424093800	Tu7	434938067	434938096
	WRC0745	6A	515643474	Tu6	484226370	484226563
	WRC0747	6A	534962071	Tu6	499173845	499173945
	WRC1161	6A	554104391	Tu6	515785253	515785353
	WRC0754	6A	604386098	Tu6	561488188	561488369
	WRC0801	6B	6.409e+08	Tu5	210587723	210587762
	WRC0750	6A	587556591	Tu6	542820017	542820143
	WRC1206	6A	595563983	Tu6	551110665	551110765
	WRC0804	6B	683649022	Tu6	551567048	551567175
	WRC0755	6A	604877087	Tu6	561749947	561750140
	WRC0240	2B	678026214	Tu7	14191406	14191232
	WRC0954	7D	22470539	TuUngrouped_contig_8131	1992	2252
	WRC0953	7D	22470477	TuUngrouped_contig_8131	2117	2252
	WRC0866	7A	42076506	Tu7	41630647	41630831
	WRC0474	4A	659317210	Tu7	55971844	55972014
	WRC0869	7A	128909865	Tu7	128555410	128555577
	WRC1380	7A	133671790	Tu7	130647028	130647128
	WRC0871	7A	172908368	TuUngrouped_contig_7092	10477	10668
	WRC0879	7A	246993158	Tu7	246357680	246357780
	WRC1023	7A	3.67838e+08	Tu7	299520459	299520575
	WRC0884	7A	332370297	Tu7	362626345	362626445
	WRC1024	7A	4.20672e+08	Tu7	407335468	407335635
	WRC0978	7D	3.83274e+08	Tu7	414147580	414147781
	WRC1382	7A	541900349	Tu7	530251931	530252029
	WRC0892	7A	553305586	Tu7	544650785	544650885
	WRC0893	7A	556430703	Tu7	556322302	556322402
	WRC0895	7A	635426055	Tu7	622073319	622073508
	WRC1207	7B	626030392	Tu7	647144342	647144442
	WRC1205	7A	725854837	Tu7	706475346	706475446
	WRC1026	7A	7.17811e+08	Tu7	698838732	698838909
	WRC1291	7B	7.30115e+08	Tu7	705331871	705331968
	WRC0949	7B	743992750	Tu7	712873849	712873983
